1 **Non-serotype 2 isolates from healthy pigs are a potential zoonotic reservoir of *Streptococcus suis***  
2 **genetic diversity and antimicrobial resistance**

3

4 Nattinee Kittiwon<sup>1,2,3</sup>, Jessica K. Calland<sup>4</sup>, Evangelos Mourkas<sup>4</sup>, Matthew D. Hitchings<sup>5</sup>, Susan  
5 Murray<sup>5</sup>, Pakpoom Tadee<sup>1,2</sup>, Pacharaporn Tadee<sup>6</sup>, Kwanjit Duangsonk<sup>7</sup>, Guillaume Méric<sup>4§</sup>, Samuel  
6 K. Sheppard<sup>4,8,9</sup>, Prapas Patchanee<sup>1,2#</sup>, Ben Pascoe<sup>2,4#</sup>

7

8 <sup>1</sup>Department of Food Animal Clinics, Faculty of Veterinary Medicine, Chiang Mai University, Chiang  
9 Mai, 50100, Thailand, <sup>2</sup>Integrative Research Centre for Veterinary Preventive Medicine, Faculty of  
10 Veterinary Medicine, Chiang Mai University, Chiang Mai, 50100, Thailand, <sup>3</sup>Veterinary Research  
11 and development center (Upper Northern region), Hang Chat, Lampang, 52190, Thailand, <sup>4</sup>The  
12 Milner Centre for Evolution, Department of Biology and Biochemistry, University of Bath, UK;  
13 <sup>5</sup>Swansea University Medical School, Swansea University, Singleton Park, Swansea, UK; <sup>6</sup>Faculty of  
14 Animal Science and Technology, Maejo University, Chiang Mai, 50290, Thailand; <sup>7</sup>Department of  
15 Microbiology, Faculty of Medicine, Chiang Mai University, Chiang Mai, 50200, Thailand; <sup>8</sup>Faculty  
16 of Allied Medical Science, Chiang Mai University, Chiang Mai, 50200, Thailand; <sup>9</sup>Department of  
17 Zoology, University of Oxford, South Parks Road, Oxford, OX1 3PS, UK.

18

19 # Corresponding authors: Prapas Patchanee; Integrative research center for Veterinary Preventive  
20 Medicine, Faculty of Veterinary Medicine; Chiang Mai University, Mae Hia, Muang, Chiang Mai,  
21 50100, Thailand. Tel: +66 53 948023, Fax: +66 53 948062, E-mail: [prapas.pat@cmu.ac.th](mailto:prapas.pat@cmu.ac.th); Ben  
22 Pascoe; The Milner centre of Evolution, Department of Biology and Biochemistry, Faculty of  
23 Science, University of Bath, Claverton Down, Bath, BA2 7AY, UK; E-mail: [B.Pascoe@bath.ac.uk](mailto:B.Pascoe@bath.ac.uk)

24

25 **Running title:** MDR *S. suis* from healthy pigs

26 § Present address: Cambridge Baker Systems Genomics Initiative, Baker Heart and Diabetes Institute,  
27 Melbourne, Victoria, Australia.

28 **Significance statement**

29 The zoonotic pathogen *Streptococcus suis* causes respiratory disease in pigs and is among the most  
30 common causative agents of human clinical bacterial meningitis in SE Asia. We collected isolates  
31 from farmed healthy pigs in Northern Thailand, representing a source population from which invasive  
32 isolates have recently emerged – linked to the pork production industry. Pangenome characterisation  
33 of the isolates revealed a reservoir of genetic diversity and antimicrobial resistance suggesting that  
34 One Health approaches may be beneficial in tackling the increase in antimicrobial resistance.

35

36 **Summary**

37 *Streptococcus suis* is a leading cause of bacterial meningitis in SE Asia, with frequent zoonotic  
38 transfer to humans associated with close contact with pigs. A small number of invasive lineages are  
39 responsible for endemic infection in the swine industry causing considerable global economic losses.  
40 A lack of surveillance and a rising trend in clinical treatment failure has raised concerns of growing  
41 antimicrobial resistance (AMR) among invasive *S. suis*. The source-sink dynamics between healthy  
42 and disease isolates is poorly understood and, in this study, we sample and sequence a collection of  
43 isolates predominantly from healthy pigs in Chiang Mai province, Northern Thailand. Pangenome  
44 comparisons with a selection of invasive serotype 2 isolates identified increased genetic diversity and  
45 more frequent AMR carriage in isolates from healthy pigs. Multiple antimicrobial resistance genes  
46 were identified conferring resistance to aminoglycosides, lincosamides, tetracycline and macrolides.  
47 All isolates were non-susceptible to three or more different antimicrobial classes, and 75% of non-  
48 serotype 2 isolates were non-susceptible to 6 or more classes (compared to 37.5% of serotype 2  
49 isolates). Antimicrobial resistance genes were found on integrative and conjugative elements (ICE)  
50 previously observed in other species, suggesting mobile gene pool which can be accessed by invasive  
51 disease isolates.

52

53 **Keywords:** *Streptococcus suis* / antimicrobial resistance / zoonosis / horizontal gene transfer / mobile  
54 elements / one health / gene pool transmission / meningitis

55

## 56 **Background**

57 More than half the world's pork meat is produced in SE Asia, and China alone is home to nearly half  
58 the world's live pigs. The United Nations' Food and Agricultural Organization estimated that China  
59 produces around half of the billion pigs reared worldwide (Gilbert et al., 2018). This massive increase  
60 in agricultural intensification has brought significant challenges in animal welfare, including infection  
61 control. Among the most common infections to Asian herds is a respiratory disease caused by  
62 *Streptococcus suis* (VanderWaal and Deen, 2018). Infection with *S. suis* occurs mainly in piglets and  
63 growing pigs and can lead to septicemia with sudden death, arthritis, endocarditis, meningitis  
64 (Dutkiewicz et al., 2017; Gottschalk and Segura, 2019; Segura, 2020). *S. suis* infections accounted for  
65 a loss of over US\$11 million to the pork industry in Thailand alone in 2019 (Rayanakorn et al., 2020).  
66 This expanded niche for *S. suis* has provided opportunities for zoonotic infection, which are  
67 frequently reported worldwide following increased exposure to pigs, often in farm workers,  
68 slaughterhouse workers, and butchers (Goyette-Desjardins et al., 2014; van Samkar et al., 2015;  
69 Dutkiewicz et al., 2017). However in SE Asia, particularly in Northern Thailand, where there is a  
70 tradition of consuming raw pork dishes, *S. suis* infection is one of the most common causative agents  
71 of clinical bacterial meningitis (Takeuchi et al., 2017; Rayanakorn et al., 2019).

72

73 Human zoonotic *S. suis* infections predominantly arise from a single virulent lineage, thought to have  
74 emerged in the 1920s alongside the intensification of the pork production industry. However, no  
75 consistent genomic differences between pig and human disease isolates have been observed (Weinert  
76 et al., 2015). This may be related to the fact that isolates from healthy (asymptomatic) pigs have not  
77 been well studied but it is known that disease-associated isolates have fewer genes overall but more  
78 that encode putative virulence factor (Weinert et al., 2019; Murray et al., 2021). Serotyping of the *S.*  
79 *suis* capsular polysaccharides is often used in epidemiological studies, with 29 *S. suis sensu stricto*  
80 serotypes described to date (Athey et al., 2016a; Segura et al., 2016). *S. suis* serotype 2 is the most  
81 virulent and is frequently isolated from diseased pigs and human clinical cases (Hughes et al., 2009;  
82 Okura et al., 2016); however, non-serotype 2 isolates (often isolated from healthy pigs) represent an

83 extensive reservoir of genetic diversity (Zhang et al., 2011; Baig et al., 2015; Okura et al., 2019;  
84 Stevens et al., 2019).

85

86 Widespread use of antimicrobial drugs in the pig production industry has driven an increase in  
87 antimicrobial resistance (AMR) (Van Boeckel et al., 2015; WHO, 2017). Imprudent use of colistin in  
88 pork production as a growth enhancer (since the 1970s) encouraged the development of resistance in  
89 *E. coli* (and other gram-negative bacteria), which has diminished the effectiveness of antibiotics used  
90 in human medicine (Liu et al., 2016; Delannoy et al., 2017; Patchanee et al., 2020a). Furthermore,  
91 there is a rising trend in multi-drug resistant (MDR) zoonotic pathogens, such as *Salmonella*, that pose  
92 a significant public health threat (Prasertsee et al., 2019; Patchanee et al., 2020b; Tadee et al., 2021).  
93 Regulation of veterinary use of antibiotics is difficult in low- and middle-income countries, which  
94 consequently have some of the highest AMR levels (Nguyen et al., 2016). For example, in Thailand  
95 alone, infections with antimicrobial-resistant bacteria are estimated to cause up to 38,000 human  
96 deaths each year (Pumart P, 2012).

97

98 A lack of surveillance and rise in clinical treatment failure has raised concerns of growing  
99 antimicrobial resistance among invasive *S. suis* (Pathanasophon et al., 2013). Furthermore, the source-  
100 sink dynamics among commensal and disease-causing isolates are poorly understood. In this study,  
101 we sample and sequence a collection of isolates predominantly from healthy pigs in Chiang Mai  
102 province, Northern Thailand. Pangenome comparisons with a selection of invasive serotype 2 isolates  
103 identified increased genetic diversity and more frequent AMR carriage in isolates from healthy pigs.  
104 Antimicrobial resistance genes were found on integrative and conjugative elements (ICE) previously  
105 observed in other species, suggesting mobile gene pool which can be accessed by invasive disease-  
106 causing isolates.

107

108 **Results**

109 All *S. suis* samples collected from healthy pigs in Chiang Mai province, Thailand were identified by  
110 PCR (**Table S1**) as non-serotype 2 isolates. From the 138 isolates we collected, 25 were randomly  
111 selected for whole genome sequencing. An additional 11 isolates from lab archives, previously  
112 collected from Chiang Mai were added to the dataset to include representative isolates from pig  
113 disease and invasive human infection. In total, the dataset used consisted of 36 isolates, of which 8  
114 isolates (22.2%) were serotype 2, including isolates from human clinical cases (n=2), diseased pigs  
115 (n=2), and healthy pigs (n=4) and 28 isolates (77.8%) of non-serotype 2 *S. suis* from healthy pigs  
116 (**Figure 1A; Table S2**).

117

118 ***Non-serotype 2 isolates are a reservoir of antimicrobial resistance***

119 No non-serotype 2 isolates were responsible for disease in either pigs or humans. A maximum-  
120 likelihood phylogeny constructed from a concatenated gene-by-gene core genome alignment (1,348  
121 genes) revealed a highly structured population (**Figure 1B; Supplementary file S1**). Serotype 2  
122 isolates clustered together, including the previously described sequence types ST-1, ST-28, ST-104  
123 and ST-105. Pairwise average nucleotide identity (ANI) comparisons suggested that non-serotype 2  
124 isolates (75.1% identical) were more diverse than serotype 2 isolates (98.1% identical) in the core  
125 genome (**Figure 2AB**). This was supported by (pairwise) clustering of the core and accessory genome  
126 using PopPUNK (Lees et al., 2019), which identified divergence in the accessory genomes of the  
127 serotype 2 isolates (**Figure 2C**). Together the pangenome of all 36 isolates comprised 5,004 gene  
128 clusters, with 1,348 core genes present in at least 95% of isolates representing ~27% of the  
129 pangenome; or ~68% of the average *S. suis* genome (1,993 ORFs in BM407; **Figure 2D; Table S3**).  
130 Typically, invasive serotype 2 isolates have smaller genomes but contain more virulence-related genes  
131 (Weinert et al., 2015). In our dataset, this was also true with serotype 2 isolates having smaller  
132 genomes on average (**Table S2**), and the virulence associated *pilB* gene was found in 75% (n=3 of 4)  
133 of invasive isolates, but only 7% of isolates from healthy pigs (n=2 of 28) (**Figure 1B; Table S4**).

134

135 ***Widespread AMR determinants in S. suis isolates from healthy pigs***

136 We scanned all 36 genomes for known determinants of antimicrobial resistance (AMR) through  
137 nucleotide comparisons ( $\geq 70\%$  sequence identity) with the NCBI database (Coordinators, 2018;  
138 Bortolaia et al., 2020) and identified 18 resistance genes from 7 different antimicrobial classes  
139 (**Figure 1B; Table S5**). Loci conferring putative resistance to aminoglycosides (*aadE*, *ant(6)-Ia*,  
140 *aph(3')-III* and *spw*); macrolides (*erm(A)*, *erm(B)*, *erm(T)*, *mef(A)* and *msr(D)*); lincosamides (*lsa(E)*,  
141 *lnu(B)* and *lnu(C)*); tetracycline (*tet(w)*, *tet(L)* and *tet(O)*); oxazolidinone (*optrA*); nucleoside (*sat4*)  
142 and chloramphenicol (*catA8*) were found in 32 isolates (89%). On average, fewer antibiotic resistance  
143 genes were identified in the serotype 2 isolates (5 genes) compared to non-serotype 2 isolates (18  
144 genes; **Table S5**). All 18 of the resistance genes were detected in the non-serotype 2 isolates from  
145 healthy pigs, but only five of the potential AMR genes *spw*, *lsa(E)*, *erm(B)*, (*lnu(B)*, and *tet(O)*) were  
146 found in the eight serotype 2 isolates, including *tet(O)* which was present in all serotype 2 isolates. At  
147 least one antimicrobial resistance gene from three or more antimicrobial classes was found in 21 out  
148 of 36 isolates (58%), and only one out of these was a *S. suis* serotype 2 isolate.

149

#### 150 ***Evidence of mobility of AMR genes among S. suis from healthy pigs***

151 Comparison of nucleotide sequences from all the genomes with the PlasmidFinder database (Carattoli  
152 et al., 2014) identified loci identified on six putative integrative and conjugative elements (ICE),  
153 including pLFE1, pBM407, pAMbeta, Col440II, pLW043, and pCW7 (**Figure 1B; Table S6**). All  
154 putative ICE elements were identified in non-serotype 2 isolates (39%; 11 of 28). Two of these ICE  
155 elements have previously been characterized in invasive *S. suis*, pBM407 (accession: FM252033) and  
156 pAMbeta (accession: AE002565.1). The pBM407 plasmid described in *S. suis* contained AMR genes  
157 conferring resistance to tetracycline (*tetO*, *tetL*), chloramphenicol (acetyltransferase), erythromycin  
158 (*ermB*) and a dihydrofolate reductase (Holden et al., 2009). However, plasmids from two different  
159 isolates with variation in gene content hint at an underlying diversity - and this potential composite  
160 architecture was evidenced by differences in the AMR gene complement (Holden et al., 2009). All  
161 serotype 2 isolates contain the *tetO* locus, and 75% (6 of 8) contain the *ermB* locus which are  
162 described as members of the pBM407 ICE element, but no other pBM407 genes are identified by this  
163 method (**Table S6**). Additional plasmids not previously described in *S. suis* were also identified using

164 MOB-suite, which compares genome sequences with all described plasmids in the NCBI database  
165 (**Table S7**; (Robertson and Nash, 2018; Robertson et al., 2020).

166

### 167 ***Widespread antimicrobial resistance in non-serotype 2 isolates***

168 Disk diffusion assays were used to determine antimicrobial susceptibility of the isolates to 18  
169 antimicrobial agents, from 9 antimicrobial categories. Most isolates were highly susceptible to  
170 linezolid (100%; n=36), amoxicillin-clavulanic acid (97%; n=35), ceftiofur (94%; n=34), amoxicillin  
171 (83%; n=30) and ampicillin (81%; n=29). High levels of resistance were observed against lincomycin  
172 (100%; n=36), clindamycin (97%; n=35), tetracycline (92%; n=33), doxycycline (92%; n=33),  
173 kanamycin (89%; n=32), oxytetracycline (83%; n=30), erythromycin (69%; n=25) and gentamycin  
174 (31%; n=11) (**Table 1**). There was a statistically significant difference in antimicrobial susceptibility  
175 between *S. suis* serotype 2 and non-serotype 2 isolates for gentamycin (*p*-value: 0.037),  
176 chloramphenicol (*p*-value: 0.010), and penicillin G (*p*-value: 0.001; Pearson's Chi-square test and  
177 Fisher's exact test) (**Table 1**).

178

179 Multi-drug resistance (MDR) is defined as an isolate that is non-susceptible to at least one  
180 antimicrobial agent from three different antimicrobial categories (Sweeney et al., 2018). In this study,  
181 we will consider all non-susceptible isolates as resistant. All 36 *S. suis* isolates were resistant to three  
182 or more antibiotic classes (**Figure 3A; Table 1**). Most (87.5%; 7 of 8) serotype 2 isolates were  
183 resistant to four and five antimicrobial categories; while three quarters (21 of 28) of non-serotype 2  
184 isolates were resistant to 6, 7 and 8 antimicrobial categories (46.4, 25 and 3.6%, respectively; **Figure**  
185 **3B**).

186

### 187 ***Diverse AMR profiles in S. suis isolates from healthy pigs***

188 Increased diversity in the core, accessory, and plasmid content of non-serotype 2 isolates was  
189 associated with increased AMR conferred by 21 different antimicrobial resistance gene (ARG)  
190 profiles (A–U; **Figure 3A; Table 2**). The most common ARG pattern included the *erm(B)* and *tet(O)*  
191 genes (13.9%), followed by *aadE/erm(B)/tet(O)* and *ant(6)-Ia /erm(B)/mef(A)/msr(D)/tet(W)* gene

192 patterns (8.3%). All putative resistance genes were absent in 4 non-serotype 2 strains (11.1%). Non-  
193 serotype 2 isolates demonstrated greater variation in ARG content, with only three resistance gene  
194 patterns (B, C and P) found exclusively in serotype 2 isolates.

195

### 196 ***Phenotypic and genotypic concordance in antimicrobial resistance***

197 When we compared phenotypic non susceptibility (zones of inhibition) with the presence of specific  
198 ARGs, often there was no clear correlation (**Table 3; Figure S1**). There was little correlation between  
199 gentamycin, kanamycin, lincosamide, clindamycin resistance and the presence of any specific ARG.  
200 Widespread resistance to tetracycline (97.2% non susceptible; **Table 1**), doxycycline and  
201 oxytetracycline correlated with the presence of ARGs, including *tet(O)*, *tet(W)* and *tet(L)* (OR > 1;  
202 **Table 3**). The strongest link between phenotype and ARG was observed for erythromycin resistance  
203 and the presence of *erm(B)* (OR= 32.5,  $p = 0.002$ ; **Table 3**). Phenotypic resistance to erythromycin  
204 correlated well with the ARGs *erm(A)*, *erm(T)*, *mef(A)* and *msr(D)*; and 72.2% of erythromycin  
205 resistant isolates contained the *erm(B)* gene (**Table 3; Figure S1**). There were not enough resistant  
206 isolates to properly assess the correlation between the presence of genes linked to resistance to  
207 chloramphenicol (n=1) and florfenicol (n=1) and none of the isolates were resistant to the first  
208 generation oxazolidinones, linezolid, despite identification of the corresponding *optrA* resistance gene  
209 (**Table 3; Figure S1**).

210



211 **Discussion**

212 *S. suis* were cultured and identified from 18.6% of pigs swabbed in this study (138 of 760 samples),  
213 which is within the range previously reported for the prevalence in farmed pigs and slaughterhouses in  
214 the same area of Thailand (Padungtod et al., 2010; Kongkaew et al., 2012). This level of prevalence  
215 was significantly lower than the *S. suis* prevalence previously reported in pigs from other provinces in  
216 Northern Thailand, such as Lampang (64.8%) and Phayao (61.4%) (Pathanasophon et al., 2013).  
217 These and other studies in Northern Thailand reported high prevalence of serotype 2 (5.6- 43%) and  
218 serotype 7 (8.2-14.3%) isolates (Padungtod et al., 2010; Thongkamkoon et al., 2017). However, we  
219 mainly identified non-serotype 2 isolates, with only a single isolate typed as serotype 9 and no  
220 serotype 2 isolates identified during this survey. This variation is likely due to differences in  
221 sampling, as we prioritised collection from healthy pigs. Invasive disease isolates have shown  
222 biogeographical variation, and with competition and serotype replacement noted among virulent *S.*  
223 *suis* serotypes (Flores et al., 1993; Hughes et al., 2009; Hadjirin et al., 2020). Serotype 9 is most  
224 common in diseased pigs from Europe and has a low pathogenic potential in humans. However, a rare  
225 case of serotype 9 infection in humans has recently been reported in Thailand (Goyette-Desjardins et  
226 al., 2014; Kerdsin et al., 2017).

227

228 Difficulties in (capsule) serotyping *S. suis* (*sensu lato*) isolates, where previously typed *S. suis* isolates  
229 are now designated as other *Streptococcus* species hint at an ambiguous species designation and  
230 variation in non-serotype 2 isolates (Prüfer et al., 2019; Hatrongjit et al., 2020). This is further  
231 supported by characterisation of divergent *S. suis* isolates by whole genome sequencing (Baig et al.,  
232 2015). The extent to which these represent stable lineages is unclear, with the rate of lineage turnover  
233 in *S. suis* seldom investigated (Calland et al., 2020; Hadjirin et al., 2020). We identified increased  
234 variation in the core and accessory genomes of non-serotype 2 isolates (**Figures 1 and 2**). Serotype 2  
235 isolates are typically found to have smaller genomes than non-invasive isolates (Baig et al., 2015;  
236 Weinert et al., 2015) and our collection of mostly non-invasive non-serotype 2 isolates were  
237 consistently larger (with more genes; **Table S2**) than the *S. suis* reference genome (BM407: 2,170,810  
238 bp) and selected invasive isolates (**Table S2**). Despite smaller genomes, these invasive isolates also

239 tend to carry more virulence-related genes and all serotype 2 isolates in our collection carried the *pilB*  
240 gene, which is associated with the brain cell invasion required to cause meningitis in humans and pigs  
241 (Maisey et al., 2007). It has been suggested that this reduction in genome size may be due to gene  
242 loss, including core metabolism genes for nutrients that can be scavenged from the host; and a  
243 streamlining of functional/redundant elements (Weinert and Welch, 2017; Murray et al., 2021).

244

245 A plug-and-play theory of bacterial accessory genomes (Young, 2016; McInerney et al., 2017;  
246 Sheppard et al., 2018), where diversity in bacterial phenotypes can be conferred by a mobile pool of  
247 genes that are readily gained and lost, enables the acquisition of rapid adaptive genomic changes that  
248 can be spread through the population via recombination (Redondo-Salvo et al., 2020). Host switching  
249 and zoonotic infection complicate analyses of source and sink dynamics and attribution of AMR  
250 elements (Dearlove et al., 2016; Mourkas et al., 2019). Here, we focus primarily on the potential  
251 reservoir of infection and characterize variation in the gene pool from which invasive disease isolates  
252 have arisen. Where resistance is conferred by a single (or few) nucleotide substitution(s), it is  
253 impossible to tell from sequence data if HGT or point mutation were responsible (Zhao et al., 2016;  
254 Bortolaia et al., 2020). For other classes of antibiotics, the literature provides clear evidence for HGT  
255 of genes (Florez-Cuadrado et al., 2017; Wang et al., 2018; Patchanee et al., 2020a; Redondo-Salvo et  
256 al., 2020). For example, the pBM407 plasmid characterised in the pBM407 *S. suis* reference genome  
257 mobilizes *tetO*, *tetL*, *emrB*, *cat* and *dfp* genes between isolates (Holden et al., 2009; Hoa et al., 2011).  
258 Including these putative tetracycline resistance genes, our analyses identified 18 accessory genes  
259 associated with resistance to 7 antimicrobial classes.

260

261 We identified genes with described roles in resistance to aminoglycosides, macrolides, lincosamides,  
262 tetracycline, nucleoside, oxazolidinones, and phenicols. Most isolates were predicted to be MDR  
263 (80.6%). The most common antimicrobial resistant genes identified were associated with resistance to  
264 macrolides and tetracycline. More than 80% of isolates contained at least one gene predicted to confer  
265 macrolide resistance (Palmieri et al., 2011). The presence of *erm(B)* and *mef(A)* genes are consistent  
266 with previous studies, where *erm(B)* is strongly linked with macrolide-lincosamide-streptogramin B

267 (MLS<sub>B</sub>) resistance and presented in 59-90% of macrolide-resistant *S. suis* isolates from pigs (Martel et  
268 al., 2001; Zhang et al., 2015; Tan et al., 2020). The resistant gene, *erm(T)* has been detected in *S.*  
269 *agalactiae*, *S. pyogenes*, and other erythromycin-resistant isolates of group D *Streptococci* (Chen et  
270 al., 2012; Zhang et al., 2015; Yongkiettrakul et al., 2019), our identification of *erm(T)* in this study  
271 suggests potential within-genus HGT.

272

273 The most common tetracycline resistance gene detected was *tet(O)* in over half of the isolates (63.9%)  
274 (**Table 3**). An alternative ribosomal protein, *tet(M)* is also often associated with tetracycline resistance  
275 in *S. suis* (Palmieri et al., 2011; Bojarska et al., 2016) but was not observed among our isolates. In  
276 addition, we detected *tet(L)* and *tet(W)* genes, which have not often been reported in *S. suis*, among  
277 non-serotype 2 isolates from healthy pigs. Corresponding phenotypic resistance to tetracycline was  
278 reported in over 90% of isolates, which is consistent with global data reporting widespread resistance  
279 to tetracycline and macrolides, likely related to the prophylactic use in agriculture (Soares et al., 2014;  
280 Yongkiettrakul et al., 2019; Mourkas et al., 2020; Tan et al., 2020). AMR may play a role in  
281 increasing numbers of treatment failures (Hughes et al., 2009; Gurung et al., 2015; Yongkiettrakul et  
282 al., 2019), and in our study, despite widespread MDR, we observed phenotypic susceptibility to all  
283 three of the recommended antimicrobials used to treat clinical *S. suis* meningitis (penicillin, ceftiofur,  
284 and ceftriaxone) (van Samkar et al., 2015; Seitz et al., 2016). However, some  $\beta$ -lactam resistant  
285 strains (18-27%) were found in the non-clinical strain of *S.suis* (Soares et al., 2014; Yongkiettrakul et  
286 al., 2019; Segura et al., 2020). Despite this,  $\beta$ -lactam usage in pig production should be closely  
287 monitored, especially where there is prophylactic use in healthy pigs.

288

289 Concordance between the presence of predicted ARGs and phenotypic resistance was poor for most  
290 antimicrobial, and we report widespread phenotypic resistance, even in the absence of a predictive  
291 resistance element (**Figure 3**). Given the enhanced genetic diversity and lack of clear characterization  
292 of this disease reservoir, it is possible that additional resistance elements have yet to be fully  
293 described. A recent study by Hadjirin et al. identified more than 20 novel *S. suis* AMR determinants  
294 (Hadjirin et al., 2021). Even in the absence of direct antimicrobial selective pressure, broad spectrum

295 use of antibiotics act on all bacterial species in the microbiome; and this bystander effect can confer  
296 resistance on bacterial species that are not the target of the antimicrobial treatment (Tedijanto et al.,  
297 2018; Morley et al., 2019). Enrofloxacin is widely used to treat other types of bacterial infection in the  
298 respiratory and digestive systems of livestock animals, and in our collection more than 40% of  
299 isolates were resistant to this antibiotic (Lakkitjaroen et al., 2011; Yongkiettrakul et al., 2019).  
300 Spectinomycin is often used in pig production and other livestock animals combined with lincomycin  
301 (Bosman et al., 2019; Wang et al., 2020). Clusters of AMR genes (*aadE-spw-lsa(E)-lnu(B)*) have been  
302 identified in *Staphylococci* and *Enterococci* associated with lincosamides resistance (Li et al., 2014;  
303 Huang et al., 2016). We identified the combination of spectinomycin and lincosamide resistance in  
304 one serotype 2 isolate and 2 non-serotype 2 isolates from healthy pig. Individually, we identified  
305 spectinomycin and lincosamides resistance genes in a small number of isolates, as has previously been  
306 reported in invasive *S. suis* isolates (Athey et al., 2016b; Bojarska et al., 2016).

307

308 The plasmid-borne chloramphenicol resistance gene, *catA8* (McHugh et al., 2020; Yan et al., 2020),  
309 and the *optrA* gene that confers transferable combined resistance to oxazolidinones (linezolid) and  
310 phenicols (chloramphenicol and florfenicol) (Brenciani et al., 2016; Bender et al., 2018; Zhou et al.,  
311 2019) are reported here for the first time in *S. suis*. Although phenotypic susceptibility was recorded  
312 to linezolid, the isolates were resistant to chloramphenicol and florfenicol. Recently, this gene has  
313 been found in oxazolidinone-resistant *S. suis* isolates in China (Huang et al., 2017; Du et al., 2019;  
314 Huang et al., 2019). This is further evidence of the unintended effect of broad-spectrum  
315 antimicrobials, such as the oxazolidinones linezolid and tedizolid, which are highly effective against  
316 Gram-positive bacteria (Sztanke et al., 2004) but rarely used in the pig production industry. However,  
317 florfenicol has been used in livestock animals for therapeutic purposes and there is documented  
318 transfer of plasmids carrying *optrA* between different Gram-positive bacteria (Wang et al., 2015).  
319 Twenty-one different resistance gene patterns were observed, with *erm(B)* and *tet(O)* found together  
320 in 62.5% (5 of 8) of serotype 2 isolates, as previously observed (Athey et al., 2016b). Most non-  
321 serotype 2 isolates possessed ARGs to at least three antimicrobial classes (up to seven; 22/28, 78.6%).  
322 Several genetic elements, including ICE carrying antimicrobial resistance genes such as *optrA*, *ermB*,

323 *tetM*, *tetO*, and *tetW* have been reported in *S. suis* (Holden et al., 2009; Athey et al., 2016b), however  
324 plasmid elements were found only in non-serotype 2 isolates in this study.

325

### 326 **Conclusion**

327 We collected isolates from 760 healthy pigs reared in the pork industry in Northern Thailand.  
328 Through comparison of 36 whole genome sequences, we identified increased genetic diversity in  
329 these non-serotype 2 carriage isolates, from which the more invasive and pathogenic serotype 2  
330 isolates emerge. Corresponding diversity was also seen in the breadth and diversity of AMR  
331 determinants which conferred increased phenotypic non-susceptibility. This genetically diverse  
332 reservoir of *S. suis* pose a public health risk with the potential for transmission to more invasive  
333 isolates, broadening their spectrum of antimicrobial resistance. Extensive phenotypic resistance is  
334 observed to antimicrobials that are not typically used to treat this infection. This can be partly  
335 explained by the co-occurrence of resistance genes on ICEs. However, little phenotypic resistance was  
336 observed to  $\beta$ -lactams, which remain the prescribed antimicrobial for *S. suis* infection in Thailand.  
337 Continued surveillance and more stringent control of antimicrobial usage within the pork industry will  
338 be necessary to monitor a growing AMR threat in *S. Suis*.

339

340

341 **Methods**

342 **Ethical approval**

343 This study was carried out according to the guidelines for the care and use of laboratory animals  
344 (National Research Council, 2010). The study protocol was approved by the Faculty of Veterinary  
345 Medicine's Animal Care and Use Committee (Protocol number S24/2559).

346

347 ***Sample collection***

348 Samples were collected between March and November 2015, with a total of 760 tonsil swab samples  
349 collected from 111 pig farms in 25 districts of Chiang Mai province, Thailand. All swab samples were  
350 kept in Stuart transport medium (Oxoid, UK) and transported to the laboratory at 4 °C within 24 hrs  
351 of collection.

352

353 Live fattening pigs were swabbed, and *S. suis* identified in 138 samples (18.2%). Of 138 *S. suis*  
354 isolates obtained from healthy pigs, only one isolate (0.7%) was confirmed as *S. suis* serotype 9.  
355 Meanwhile, all the remaining 137 isolates (99.3%) were negative to serotypes serotype 1/2/7/9/14  
356 by PCR identification and classified as non-serotype 2 strains. Among 138 strains, 25 strains were  
357 randomly selected for WGS. In addition, 11 isolates were selected from laboratory archives (collected  
358 as part of another study of farmed pigs in Chiang Mai province during 2015) and sequenced for  
359 comparison between serotype 2 and non-serotype 2 isolates.

360

361 ***Bacterial identification and growth***

362 Tonsil swab samples were inoculated onto 5% sheep blood agar plates (Oxoid, UK) and incubated at  
363 37°C for 24 hours. *S. suis* isolates were identified by biochemical characterization (Quinn et al.,  
364 1994), and small (approximately 1 mm in diameter) transparent alpha- hemolysis and non-hemolysis  
365 colonies of Gram-positive cocci with negative catalase test were selected for further screening.  
366 Criteria for presumptive identification of *S. suis* included no growth on 6.5% NaCl agar, a negative  
367 Voges-Proskauer (VP) test, and production of acid in trehalose, lactose, sucrose, salicin and inulin  
368 broths, but no acid production in glycerol, sorbitol, and mannitol. A multiplex polymerase chain

369 reaction (PCR) using primers specific to the 16S rRNA gene was used to confirm the identification of  
370 *S. suis* and capsular gene types 1 or 14, 2 or 1/2, 7, and 9, which are the most prevalent serotypes  
371 recovered from diseased pigs, as described in **Table S1** (Wisselink et al., 2000; Wisselink et al., 2002;  
372 Marois et al., 2004).

373

#### 374 ***Antimicrobial susceptibility testing***

375 Antimicrobial susceptibility tests were performed using the disk diffusion method in accordance with  
376 the recommendations of the Clinical and Laboratory Standards Institute (CLSI) (CLSI, 2012).  
377 Eighteen antibiotic drugs from 9 antibiotic groups were used in the test, including aminoglycoside  
378 (gentamycin, 10 µg; and kanamycin, 30 µg), lincosamides (lincomycin, 10 µg; and clindamycin, 2  
379 µg), macrolides (erythromycin, 15 µg), tetracyclines (tetracycline, 30 µg; doxycycline, 30 µg; and  
380 oxytetracycline, 30 µg), oxazolidinone (linezolid, 30 µg), phenicols (chloramphenicol, 30 µg; and  
381 florfenicol 30 µg), beta-lactams (ampicillin, 10 µg; penicillin G, 10 units; amoxicillin, 10 µg;  
382 amoxicillin-clavulanic acid, 30 µg; and ceftiofur, 30 µg), fluoroquinolones (enrofloxacin, 5 µg) and  
383 folate inhibitors (sulfamethoxazole/trimethoprim, 1.25/23.75 µg) (Oxoid. Hamshire, UK). Diameter  
384 breakpoints were assessed according to the guidelines described in Table 1 (CLSI, 2002, 2008, 2012;  
385 Howe and Andrews, 2012; NEO-SENSITABS™, 2013; CLSI, 2017, 2018, 2020). Pearson's Chi-  
386 square test and Fisher's exact test were performed using IBM SPSS Statistics version 22 (IBM, New  
387 York, USA) to determine the difference of antimicrobial susceptibility between *S. suis* serotype 2 and  
388 non-serotype 2. The association between antimicrobial-resistant phenotype and genotype was tested  
389 by Pearson's chi-square test, and Yate's correction for continuity was applied where required.  
390 Statistically significant associations were shown as odds ratios (ORs) with 95% confidence intervals  
391 (CI). Results were considered statistically significant when a two-tailed  $p$ -value  $\leq 0.05$ .

392

#### 393 ***Genome sequencing and assembly***

394 Twenty-five *S. suis* isolates from pigs with no clinical signs of *S. suis* infection (healthy pigs) were  
395 randomly selected for sequencing from the 138 recovered samples. Our collection was augmented  
396 with two archived isolates derived from tissue samples of pigs with clinical signs of *S. suis* infection

397 (diseased pigs) that were submitted to the Veterinary Medicine Research and Development Center  
398 (Upper Northern region) of the National Institute of Animal Health (Thailand), and a further nine  
399 isolates from the Faculty of Medicine at Chiang Mai University. In total, our collection included 32  
400 healthy pigs, two diseased pigs, and two human clinical samples cultured from the blood of meningitis  
401 patients. All strains were cultured in Todd-Hewitt-broth at 37 °C for 18-24 hrs, and genomic DNA  
402 was extracted using the QIAamp DNA Minikit (QIAGEN®). Whole-genome sequencing (WGS) using  
403 a multiplex sequencing approach was performed on an Illumina Miseq genome sequencer (Illumina,  
404 Cambridge UK) using Nextera XT libraries and third generation MiSeq reagent kits. Paired-end short  
405 reads of 300 bp were filtered, trimmed, and assembled *de novo* with SPAdes version 3.7 (Bankevich  
406 et al., 2012). The average number of contiguous sequences (contigs) in 36 *S. suis* genomes was 160  
407 for an average total assembled sequence size of 2.22 Mbp. The average N50 contig length (L50) was  
408 66,810 and the average GC content was 41.3%. Short read data are available on the NCBI SRA,  
409 associated with BioProject PRJNA418954. Assembled genomes and supplementary material are  
410 available from FigShare (10.6084/m9.figshare.13385465; individual accession numbers and  
411 assembled genome statistics in **Table S2**).

412

### 413 ***Population structure and phylogeny***

414 A multisequence alignment was created from concatenated gene sequences of all core genes (found in  
415 >95% isolates) from the reference genome, BM407 (Holden et al., 2009) using MAFFT (Katoh et al.,  
416 2002) on a gene-by-gene basis (Morley et al., 2019)(size: 1,202,840 bp; **Supplementary file S1**).  
417 Maximum-likelihood phylogenies were reconstructed with IQ-TREE (version 1.6.8) using the  
418 GTR+F+I+G4 substitution model and ultra-fast bootstrapping (1,000 bootstraps) (Nguyen et al.,  
419 2015); and visualized on Microreact (Argimón et al., 2016): <https://microreact.org/project/Ssuis-ns2>

420

### 421 ***Accessory genome characterization***

422 All unique genes present in at least one isolate (the pangenome) were identified by automated  
423 annotation using PROKKA (version 1.13) followed by PIRATE, a pangenomics tool that allows for  
424 orthologue gene clustering in bacteria (Seemann, 2014; Bayliss et al., 2019). We defined genes in



425 PIRATE using a wide range of amino acid percentage sequence identity thresholds for Markov  
426 Cluster algorithm (MCL) clustering (45, 50, 60, 70, 80, 90, 95, 98). The pan-genome of all 36 isolates  
427 contained 5,004 genes, of which 1,348 genes were shared by all isolates (>95%) and defined the core  
428 genome (**Table S3**). Pairwise core and accessory genome distances were compared using PopPUNK  
429 (version 1.1.4) (Lees et al., 2019), which uses pairwise nucleotide kmer comparisons to distinguish  
430 shared sequence and gene content to identify accessory genome divergence in relation to the core  
431 genome. A two-component Gaussian mixture model was used to build a network to define clusters  
432 (Components: 41; Density: 0.0579; Transitivity: 0.9518; Score: 0.8967).

433

#### 434 *Identification of virulence-associated genes*

435 The accessory genome of each isolate was characterized, including detection of antimicrobial  
436 resistance genes, putative virulence factors, and known plasmid genes using ABRICATE (version  
437 0.9.8) (<https://github.com/tseemann/abricate>) and the NCBI, VfDB, and PlasmidFinder databases  
438 (10th September 2019 update; **Tables S4, S5 and S6**) (Carattoli et al., 2014; Coordinators, 2018; Liu  
439 et al., 2019; Bortolaia et al., 2020). ABRICATE was used to identify antimicrobial resistance genes in  
440 the sequenced genomes by comparison with the NCBI database of 1,726 resistance genes covering 15  
441 antimicrobial agent types; including genes associated with resistance to aminoglycosides,  $\beta$ -lactam,  
442 colistin, fluoroquinolone, fosfomycin, fusidic acid, glycopeptide, MLS-macrolide-lincosamide-  
443 streptogramin B, nitroimidazole, oxazolidinones, phenicols, rifampicin, sulphonamides, tetracycline,  
444 and trimethoprim. An astringent threshold of 98% identity was used for reporting a match between a  
445 gene in the NCBI database and the input genome. T-test and Fisher's exact test assessed statistical  
446 significance at 5% significance.

447

448 ***Declarations***

449 **Ethical approval**

450 This study was carried out according to the guidelines for the care and use of laboratory animals  
451 (National Research Council, 2010). The study protocol was approved by the Faculty of Veterinary  
452 Medicine's Animal Care and Use Committee (Protocol number S24/2559).

453

454 **Data availability**

455 Short read data are available on the NCBI SRA, associated with BioProject PRJNA418954  
456 (<https://www.ncbi.nlm.nih.gov/bioproject/PRJNA418954>). Assembled genomes and supplementary  
457 material are available from FigShare: doi: 10.6084/m9.figshare.13385465.

458

459 **Competing interests**

460 The authors declare no competing interests.

461

462 **Funding**

463 This research work was partially supported by Chiang Mai University and National research of  
464 Thailand (HS2349). All high-performance computing was performed in collaboration with MRC  
465 CLIMB, funded by the Medical Research Council (MR/L015080/1 & MR/T030062/1). Collaborative  
466 visits between UK and Thai partners were supported by Newton Fund Researcher Links travel grant.  
467 The funders played no role in study design or implementation.

468

469 **Author contributions**

470 NK: acquisition, analysis, and interpretation of data; drafted manuscript.

471 JKC: analysis, and interpretation of data; revised manuscript.

472 EM: analysis, and interpretation of data; revised manuscript.

473 MDH: acquisition and interpretation of data; revised manuscript.

474 SM: acquisition and interpretation of data; revised manuscript.

475 PakT: acquisition and interpretation of data; revised manuscript.

476 PacT: acquisition interpretation of data; revised manuscript.

477 KD: acquisition and interpretation of data; revised manuscript.

478 GM: interpretation of data; revised manuscript.

479 SKS: interpretation of data; revised manuscript.

480 PP: conceptualized and designed work; acquisition, analysis, and interpretation of data; drafted  
481 manuscript.

482 BP: conceptualized and designed work; acquisition, analysis, and interpretation of data; drafted  
483 manuscript.

484

## 485 **Acknowledgments**

486 We are grateful to all the technicians, scientists, and non-technical staff of the Veterinary Research  
487 and Development center (Upper northern region), Lampang, Thailand, and Swansea University  
488 medical school, Swansea, UK, for their cooperation and support.

489

## 490 **Tables and Figures**

491 **Table 1.** Antimicrobial susceptibility test results by disk diffusion method of 36 *S. suis*, grouped by  
492 serotype. Susceptible (S), intermediate (I) and resistant (R) phenotypes are indicated. Asterisk (\*)  
493 indicates statistical significance by Pearson's Chi-square test and Fisher's exact test,  $p$ -value < 0.05.

494

495 **Table 2.** Antimicrobial resistance gene patterns of 36 *S. suis* isolates.

496

497 **Table 3.** Concordance of antimicrobial resistance phenotype and genotypes. Presence of resistance  
498 genes (G+) and number of phenotypically non-susceptible isolates (P+) indicated. Asterisk indicates  
499  $p$ -value < 0.05 by Pearson's chi-square test, and Yate's correction for continuity.

500

## 501 **Figure 1.**

502 **A:** Isolates were collected as part of a survey of healthy pigs in Chiang Mai province, Thailand. **B:**  
503 Population structure of selected sequenced isolates compared with other serotype 2 genomes from the  
504 same region. All core genes (present in  $\geq 95\%$  of isolates) from the reference genome (1,348 genes)  
505 were used to build a gene-by-gene alignment ( $n = 36$ ; 1,202,840 bp). A maximum-likelihood

506 phylogeny was constructed with IQ-TREE, using a GTR model and ultrafast bootstrapping (1,000  
507 bootstraps; version 1.6.8; Nguyen et al; 2015; Hoang et al 2018). Scale bar represents genetic distance  
508 of 0.01. Leaves are colored by disease status and host: samples from healthy pigs are green; diseased  
509 pigs are yellow; and samples from human clinical cases are red. Serotype 2 isolates are shaded in  
510 blue, with common STs annotated. The presence of antimicrobial resistance genes, known plasmids  
511 and virulence genes identified using ABRICATE and NCBI, PlasmidFinder and Vfdb databases are  
512 indicated by coloured blocks. Interactive visualization is available on Microreact:  
513 <https://microreact.org/project/Ssuis-ns2> (Argimon *et al*; 2016).

514

### 515 **Figure 2.**

516 **A:** Heatmap of pairwise average nucleotide identity (ANI). Highly similar pairwise comparisons are  
517 colored in red to blue for the most dissimilar isolates. The cluster of serotype 2 isolates are boxed. **B:**  
518 Summary of pairwise comparisons between serotype 2 and non-serotype 2 isolates. **C:** PopPUNK  
519 pairwise accessory distances visualized with t-SNE clustering in microreact:  
520 <https://microreact.org/project/Ssuis-ns2> (Argimon *et al*; 2016). **D:** Visualisation of the pangenome  
521 (PIRATE) with phandango, including estimation of the core (gene present in 95% or more isolates)  
522 and accessory genome composition (Bayliss et al; 2019; Hadfield et al 2018).

523

### 524 **Figure 3.**

525 **A:** Distribution of antimicrobial resistance patterns (black blocks indicate antimicrobial resistance  
526 genes identified in the genomes) summarized alongside their corresponding phenotypic resistance  
527 outcomes (red blocks indicated phenotypic resistance). Predicted (blue) and phenotypic (red) MDR is  
528 also indicated. **B:** Summary of the number of different antimicrobial classes to which each isolate  
529 demonstrated phenotypic resistance. Isolates resistant to three or more different antimicrobial classes  
530 were characterized as MDR.

531

### 532 **Supplementary material**

533 **Table S1:** Primers used for species and serotype identification.

534 **Table S2:** Summary of isolate genome statistics

535 **Table S3:** Summary of core and accessory genome characterization with PIRATE

536 **Table S4:** Summary of virulence genes identified by comparison with the VfDB database.

537 **Table S5:** Summary of AMR genes identified by comparison with the NCBI database.

538 **Table S6:** Summary of plasmid genes identified by comparison with the PlasmidFinder database.

539 **Table S7:** Matrix of gene presence for all plasmids identified by MOB-suite.

540

541 **Figure S1:** The effect of each ARG on phenotypic resistance diffusion diameters for

542 aminoglycosides, lincosamides, tetracyclines, phenicols, oxazolidinone and macrolide.

543

544 **Supplementary file 1:** Alignment file.

545

546 ***List of abbreviations***

547 AMC Amoxicillin-Clavulanic acid

548 AMP Ampicillin

549 AMR Antimicrobial Resistance

550 AMX Amoxicillin

551 ARGs Antimicrobial Resistance Genes

552 CARD Comprehensive Antibiotic Resistance Database

553 CHL Chloramphenicol

554 CLI Clindamycin

555 CTF Ceftiofur

556 DOX Doxycycline

557 ENR Enrofloxacin

558 ERY Erythromycin

559 FLO Florfenicol

560 GEN Gentamycin

561 ICE Integrative and Conjugative Elements

562 KAN Kanamycin

563 LIN Lincomycin

564 LZD Linezolid

565 MDR Multiple Drug Resistance

566 MLS Macrolide-Lincosamide-Streptogramin B

567 NCBI National Center for Biotechnology Information

568 OTC Oxytetracyclin

569 PEN Penicillin G

570 SXT Sulfamethoxazole/Trimethoprim

571 TET Tetracycline

572 VFDB Virulence Factor Database

573 **References**

- 574 Argimón, S., Abudahab, K., Goater, R.J.E., Fedosejev, A., Bhai, J., Glasner, C. et al. (2016)  
575 Microreact: visualizing and sharing data for genomic epidemiology and phylogeography.  
576 Microbial genomics 2: 11.
- 577 Athey, T.B., Teatero, S., Lacouture, S., Takamatsu, D., Gottschalk, M., and Fittipaldi, N. (2016a)  
578 Determining *Streptococcus suis* serotype from short-read whole-genome sequencing data.  
579 BMC Microbiol 16: 162.
- 580 Athey, T.B., Teatero, S., Takamatsu, D., Wasserscheid, J., Dewar, K., Gottschalk, M., and Fittipaldi,  
581 N. (2016b) Population structure and antimicrobial resistance profiles of *Streptococcus suis*  
582 serotype 2 sequence type 25 strains. PloS one 11: e0150908.
- 583 Baig, A., Weinert, L.A., Peters, S.E., Howell, K.J., Chaudhuri, R.R., Wang, J. et al. (2015) Whole  
584 genome investigation of a divergent clade of the pathogen *Streptococcus suis*. Frontiers in  
585 microbiology 6:1191.
- 586 Bankevich, A., Nurk, S., Antipov, D., Gurevich, A.A., Dvorkin, M., Kulikov, A.S. et al. (2012)  
587 SPAdes: a new genome assembly algorithm and its applications to single-cell sequencing.  
588 Journal of computational biology 19: 455-477.
- 589 Bayliss, S.C., Thorpe, H.A., Coyle, N.M., Sheppard, S.K., and Feil, E.J. (2019) PIRATE: A fast and  
590 scalable pangenomics toolbox for clustering diverged orthologues in bacteria. GigaScience  
591 8:10, giz119.
- 592 Bender, J.K., Cattoir, V., Hegstad, K., Sadowy, E., Coque, T.M., Westh, H. et al. (2018) Update on  
593 prevalence and mechanisms of resistance to linezolid, tigecycline and daptomycin in  
594 enterococci in Europe: towards a common nomenclature. Drug Resistance Updates 40: 25-39.
- 595 Bojarska, A., Molska, E., Janas, K., Skoczyńska, A., Stefaniuk, E., Hryniewicz, W., and Sadowy, E.  
596 (2016) *Streptococcus suis* in invasive human infections in Poland: clonality and determinants  
597 of virulence and antimicrobial resistance. European Journal of Clinical Microbiology &  
598 Infectious Diseases 35: 917-925.
- 599 Bortolaia, V., Kaas, R.S., Ruppe, E., Roberts, M.C., Schwarz, S., Cattoir, V. et al. (2020) ResFinder  
600 4.0 for predictions of phenotypes from genotypes. Journal of Antimicrobial Chemotherapy 75:  
601 3491-3500.
- 602 Bosman, A.L., Loest, D., Carson, C.A., Agunos, A., Collineau, L., and Léger, D.F. (2019) Developing  
603 Canadian Defined Daily Doses for Animals: A Metric to Quantify Antimicrobial Use.  
604 Frontiers in Veterinary Science 6: 220.
- 605 Brenciani, A., Morroni, G., Vincenzi, C., Manso, E., Mingoia, M., Giovanetti, E., and Varaldo, P.E.  
606 (2016) Detection in Italy of two clinical *Enterococcus faecium* isolates carrying both the  
607 oxazolidinone and phenicol resistance gene *optrA* and a silent multiresistance gene *cfr*.  
608 Journal of Antimicrobial Chemotherapy 71: 1118-1119.
- 609 Calland, J.K., Pascoe, B., Bayliss, S.C., Mourkas, E., Berthenet, E., Thorpe, H.A. Hitching, M.D. Feil,  
610 E.J. Blaser, M.J. Falush, D. and Sheppard, S.K. (2020) Quantifying bacterial evolution in the  
611 wild: a birthday problem for *Campylobacter* lineages. bioRxiv.
- 612 Carattoli, A., Zankari, E., García-Fernández, A., Larsen, M.V., Lund, O., Villa, L. Aarestrup, F.M.  
613 and Hasman, H. (2014) In silico detection and typing of plasmids using PlasmidFinder and  
614 plasmid multilocus sequence typing. Antimicrobial agents and chemotherapy 58: 3895.
- 615 Chen, L., Song, Y., Wei, Z., He, H., Zhang, A., and Jin, M. (2012) Antimicrobial susceptibility,  
616 tetracycline and erythromycin resistance genes, and multilocus sequence typing of  
617 *Streptococcus suis* Isolates from Diseased Pigs in China. Journal of Veterinary Medical  
618 Science 12:0279.
- 619 CLSI (2002) Performance standards for antimicrobial disk and dilution susceptibility tests for bacteria  
620 isolated from animals; Approved standard-second Edition. In Clinical and Laboratory  
621 Standards Institute, Wayne, PA.
- 622 CLSI (2008) Performance Standards for Antimicrobial Disk and Dilution Susceptibility Tests for  
623 Bacteria Isolated from Animals; Approved Standard. 3rd ed. In Clinical and Laboratory  
624 Standards Institute, Wayne, PA.

- 625 CLSI (2012) Performance Standards for Antimicrobial Disk Susceptibility Tests; Approved  
626 Standard—Eleventh Edition In Clinical and Laboratory Standards Institute, Wayne, PA, p. 76.
- 627 CLSI (2017) Performance Standards for Antimicrobial Susceptibility Testing. M100-S27. In Clinical  
628 and Laboratory Standards Institute, Wayne, PA.
- 629 CLSI (2018) Performance standards for antimicrobial disk and dilution susceptibility tests for bacteria  
630 isolated from animals; 4th Edition. In Clinical and Laboratory Standards Institute, Wayne, PA.
- 631 CLSI (2020) Performance Standards for Antimicrobial Susceptibility Testing. M100-S30. In Clinical  
632 and Laboratory Standards Institute, Wayne, PA.
- 633 Coordinators NR (2018) Database resources of the national center for biotechnology information.  
634 Nucleic acids research 46: D8-D13.
- 635 Dearlove, B.L., Cody, A.J., Pascoe, B., Méric, G., Wilson, D.J., and Sheppard, S.K. (2016) Rapid host  
636 switching in generalist *Campylobacter* strains erodes the signal for tracing human infections.  
637 The ISME journal 10: 721-729.
- 638 Delannoy, S., Le Devendec, L., Jouy, E., Fach, P., Drider, D., and Kempf, I. (2017) Characterization  
639 of Colistin-Resistant *Escherichia coli* Isolated from Diseased Pigs in France. *Frontiers in*  
640 *Microbiology* 8: 2278.
- 641 Du, F., Lv, X., Duan, D., Wang, L., and Huang, J. (2019) Characterization of a linezolid-and  
642 vancomycin-resistant *Streptococcus suis* isolate that harbours *optrA* and *vanG* operons.  
643 *Frontiers in microbiology* 10: 2026.
- 644 Dutkiewicz, J., Sroka, J., Zajac, V., Wasiński, B., Cisak, E., Sawczyn, A. et al. (2017) *Streptococcus*  
645 *suis*: a re-emerging pathogen associated with occupational exposure to pigs or pork products.  
646 Part I—Epidemiology. *Annals of Agricultural and Environmental Medicine* 24: 683-695.
- 647 EUCAST- and CLSI potency NEO-SENSITABS™ (2013) Veterinary practice according to CLSI  
648 breakpoints.
- 649 Flores, J.L., Higgins, R., D'Allaire, S., Charette, R., Boudreau, M., and Gottschalk, M. (1993)  
650 Distribution of the different capsular types of *Streptococcus suis* in nineteen swine nurseries.  
651 *The Canadian veterinary journal* 34: 170-171.
- 652 Florez-Cuadrado, D., Ugarte-Ruiz, M., Méric, G., Quesada, A., Porrero, M.C., Pascoe, B. Sáez-  
653 Llorente, J.L. Orozco, G.L. Domínguez, L. and Sheppard, S.K. (2017) Genome Comparison  
654 of Erythromycin Resistant *Campylobacter* from Turkeys Identifies Hosts and Pathways for  
655 Horizontal Spread of *erm(B)* Genes. *Frontiers in Microbiology* 8: 2240.
- 656 Gilbert, M., Nicolas, G., Cinardi, G., Van Boeckel, T.P., Vanwambeke, S.O., Wint, G.R.W., and  
657 Robinson, T.P. (2018) Global distribution data for cattle, buffaloes, horses, sheep, goats, pigs,  
658 chickens and ducks in 2010. *Scientific Data* 5: 180227.
- 659 Gottschalk, M., and Segura, M. (2019) Streptococcosis. *Diseases of Swine*: 934-950.
- 660 Goyette-Desjardins, G., Auger, J.-P., Xu, J., Segura, M., and Gottschalk, M. (2014) *Streptococcus*  
661 *suis*, an important pig pathogen and emerging zoonotic agent: an update on the worldwide  
662 distribution based on serotyping and sequence typing. *Emerging microbes & infections* 3: 1-  
663 20.
- 664 Gurung, M., Tamang, M.D., Moon, D.C., Kim, S.-R., Jeong, J.-H., Jang, G.-C. et al. (2015) Molecular  
665 basis of resistance to selected antimicrobial agents in the emerging zoonotic pathogen  
666 *Streptococcus suis*. *Journal of clinical microbiology* 53: 2332-2336.
- 667 Hadjirin, N.F., Miller, E.L., Murray, G.G.R., Yen, P.L.K., Phuc, H.D., Wileman, T.M. et al. (2020)  
668 Linking phenotype, genotype and ecology: antimicrobial resistance in the zoonotic pathogen  
669 *Streptococcus suis*. bioRxiv.
- 670 Hadjirin, N.F., Miller, E.L., Murray, G.G.R., Yen, P.L.K., Phuc, H.D., Wileman, T.M. et al. (2021) A  
671 comprehensive portrait of antimicrobial resistance in the zoonotic pathogen *Streptococcus*  
672 *suis*. bioRxiv.
- 673 Hatrongjit, R., Fittipaldi, N., Gottschalk, M., and Kerdsin, A. (2020) Tools for Molecular  
674 Epidemiology of *Streptococcus suis*. *Pathogens* 9.2: 81.
- 675 Hoa, N.T., Chieu, T.T.B., Nghia, H.D.T., Mai, N.T.H., Anh, P.H., Wolbers, M. et al. (2011) The  
676 antimicrobial resistance patterns and associated determinants in *Streptococcus suis* isolated  
677 from humans in southern Vietnam, 1997-2008. *BMC infectious diseases* 11: 6-6.

- 678 Holden, M.T., Hauser, H., Sanders, M., Ngo, T.H., Cherevach, I., Cronin, A. et al. (2009) Rapid  
679 evolution of virulence and drug resistance in the emerging zoonotic pathogen *Streptococcus*  
680 *suis*. PloS one 4:7, e6072.
- 681 Howe, R.A., and Andrews, J.M. (2012) BSAC standardized disc susceptibility testing method  
682 (version 11). Journal of antimicrobial chemotherapy 67: 2783-2784.
- 683 Huang, J., Chen, L., Wu, Z., and Wang, L. (2017) Retrospective analysis of genome sequences  
684 revealed the wide dissemination of *optrA* in Gram-positive bacteria. Journal of Antimicrobial  
685 Chemotherapy 72: 614-616.
- 686 Huang, J., Sun, J., Wu, Y., Chen, L., Duan, D., Lv, X., and Wang, L. (2019) Identification and  
687 pathogenicity of an XDR *Streptococcus suis* isolate that harbours the phenicol-oxazolidinone  
688 resistance genes *optrA* and *cfr*, and the bacitracin resistance locus *bcrABDR*. International  
689 journal of antimicrobial agents 54: 43-48.
- 690 Huang, K., Zhang, Q., Song, Y., Zhang, Z., Zhang, A., Xiao, J., and Jin, M. (2016) Characterization  
691 of spectinomycin resistance in *Streptococcus suis* leads to two novel insights into drug  
692 resistance formation and dissemination mechanism. Antimicrobial agents and chemotherapy  
693 60: 6390-6392.
- 694 Hughes, J.M., Wilson, M.E., Wertheim, H.F., Nghia, H.D.T., Taylor, W., and Schultsz, C. (2009)  
695 *Streptococcus suis*: an emerging human pathogen. Clinical Infectious Diseases 48: 617-625.
- 696 Katoh, K., Misawa, K., Kuma, K.i., and Miyata, T. (2002) MAFFT: a novel method for rapid multiple  
697 sequence alignment based on fast Fourier transform. Nucleic Acids Research 30: 3059-3066.
- 698 Kerdsin, A., Hatrongjit, R., Gottschalk, M., Takeuchi, D., Hamada, S., Akeda, Y., and Oishi, K.  
699 (2017) Emergence of *Streptococcus suis* serotype 9 infection in humans. Journal of  
700 microbiology, immunology, and infection= Wei mian yu gan ran za zhi 50: 545-546.
- 701 Kongkaew, S., Wongsawan, K., Pansumtang, C., Takam, S., Yano, T., Yamsakul, P., and Patchanee,  
702 P. (2012) Identification and antimicrobial susceptibility of *Streptococcus suis* isolated from  
703 pigs tonsil swabs. Kasetsart Veterinarians 22: 1-13.
- 704 Lakkitjaroen, N., Kaewmongkol, S., Metheenukul, P., Karnchanabanthoeng, A., Satchasataporn, K.,  
705 Abking, N., and Rerkamnuaychoke, W. (2011) Prevalence and antimicrobial susceptibility of  
706 *Streptococcus suis* isolated from slaughter pigs in Northern Thailand. Kasetsart J (Nat Sci) 45:  
707 78-83.
- 708 Lees, J.A., Harris, S.R., Tonkin-Hill, G., Gladstone, R.A., Lo, S.W., Weiser, J.N. et al. (2019) Fast  
709 and flexible bacterial genomic epidemiology with PopPUNK. Genome research 29: 304-316.
- 710 Li, X.-S., Dong, W.-C., Wang, X.-M., Hu, G.-Z., Wang, Y.-B., Cai, B.-Y. et al. (2014) Presence and  
711 genetic environment of pleuromutilin-lincosamide-streptogramin A resistance gene *lsa (E)* in  
712 enterococci of human and swine origin. Journal of Antimicrobial Chemotherapy 69: 1424-  
713 1426.
- 714 Liu, B., Zheng, D., Jin, Q., Chen, L., and Yang, J. (2019) VFDB 2019: a comparative pathogenomic  
715 platform with an interactive web interface. Nucleic Acids Research 47: D687-D692.
- 716 Liu, Y.-Y., Wang, Y., Walsh, T.R., Yi, L.-X., Zhang, R., Spencer, J. et al. (2016) Emergence of  
717 plasmid-mediated colistin resistance mechanism MCR-1 in animals and human beings in  
718 China: a microbiological and molecular biological study. The Lancet Infectious Diseases 16:  
719 161-168.
- 720 Maisey, H.C., Hensler, M., Nizet, V., and Doran, K.S. (2007) Group B Streptococcal Pilus Proteins  
721 Contribute to Adherence to and Invasion of Brain Microvascular Endothelial Cells. Journal of  
722 Bacteriology 189: 1464.
- 723 Marois, C., Bougeard, S., Gottschalk, M., and Kobisch, M. (2004) Multiplex PCR assay for detection  
724 of *Streptococcus suis* species and serotypes 2 and 1/2 in tonsils of live and dead pigs. Journal  
725 of clinical microbiology 42: 3169-3175.
- 726 Martel, A., Baele, M., Devriese, L., Goossens, H., Wisselink, H., Decostere, A., and Haesebrouck, F.  
727 (2001) Prevalence and mechanism of resistance against macrolides and lincosamides in  
728 *Streptococcus suis* isolates. Veterinary microbiology 83: 287-297.
- 729 McHugh, M.P., Parcell, B.J., Pettigrew, K.A., Toner, G., Khatamzas, E., Karcher, A.M. et al. (2020)  
730 Emergence of *optrA*-mediated linezolid resistance in multiple lineages and plasmids of  
731 *Enterococcus faecalis* revealed by long read sequencing. bioRxiv.



- 732 McInerney, J.O., McNally, A., and O'Connell, M.J. (2017) Why prokaryotes have pangenomes.  
733 Nature Microbiology 2: 17040.
- 734 Morley, V.J., Woods, R.J., and Read, A.F. (2019) Bystander selection for antimicrobial resistance:  
735 implications for patient health. Trends in microbiology 27: 864-877.
- 736 Mourkas, E., Florez-Cuadrado, D., Pascoe, B., Calland, J.K., Bayliss, S.C., Mageiros, L. et al. (2019)  
737 Gene pool transmission of multi-drug resistance among *Campylobacter* from livestock,  
738 sewage and human disease. Environmental Microbiology 21: 4597-4613.
- 739 Mourkas, E., Taylor, A.J., Méric, G., Bayliss, S.C., Pascoe, B., Mageiros, L. et al. (2020) Agricultural  
740 intensification and the evolution of host specialism in the enteric pathogen *Campylobacter*  
741 *jejuni*. Proceedings of the National Academy of Sciences 117: 11018.
- 742 Murray, G.G.R., Charlesworth, J., Miller, E.L., Casey, M.J., Lloyd, C.T., Gottschalk, M. et al. (2021)  
743 Genome reduction is associated with bacterial pathogenicity across different scales of  
744 temporal and ecological divergence. Molecular Biology and Evolution 38: 1570-1579.
- 745 National Research Council (2010) Guide for the care and use of laboratory animals: National  
746 Academies Press.
- 747 Nguyen, L.-T., Schmidt, H.A., Von Haeseler, A., and Minh, B.Q. (2015) IQ-TREE: a fast and  
748 effective stochastic algorithm for estimating maximum-likelihood phylogenies. Molecular  
749 biology and evolution 32: 268-274.
- 750 Nguyen, N.T., Nguyen, H.M., Nguyen, C.V., Nguyen, T.V., Nguyen, M.T., Thai, H.Q. et al. (2016)  
751 Use of colistin and other critical antimicrobials on pig and chicken farms in Southern Vietnam  
752 and its association with resistance in commensal *Escherichia coli*. bacteria. Applied and  
753 Environmental Microbiology 82: 3727.
- 754 Okura, M., Osaki, M., Nomoto, R., Arai, S., Osawa, R., Sekizaki, T., and Takamatsu, D. (2016)  
755 Current taxonomical situation of *Streptococcus suis*. Pathogens 5: 45.
- 756 Okura, M., Maruyama, F., Ota, A., Tanaka, T., Matoba, Y., Osawa, A. et al. (2019) Genotypic  
757 diversity of *Streptococcus suis* and the *S. suis*-like bacterium *Streptococcus ruminantium* in  
758 ruminants. Veterinary Research 50: 94.
- 759 Padungtod, P., Tharavichitkul, P., Junya, S., Chaisowong, W., Kadohira, M., Makino, S., and  
760 Sthitmatee, N. (2010) Incidence and presence of virulence factors of *Streptococcus suis*  
761 infection in slaughtered pigs from Chiang Mai, Thailand. Southeast Asian journal of tropical  
762 medicine and public health 41: 1454.
- 763 Palmieri, C., Varaldo, P.E., and Facinelli, B. (2011) *Streptococcus suis*, an emerging drug-resistant  
764 animal and human pathogen. Frontiers in microbiology 2: 235.
- 765 Patchanee, P., Chokesajjawatee, N., Santiyanont, P., Chuammitri, P., Deeudom, M., Monteith, W. et  
766 al. (2020a) Multiple clones of colistin-resistant *Salmonella enterica* carrying plasmids in meat  
767 products and patients in Northern Thailand. bioRxiv.
- 768 Patchanee, P., Tanamai, P., Tadee, P., Hitchings, M.D., Calland, J.K., Sheppard, S.K. et al. (2020b)  
769 Whole-genome characterisation of multi-drug resistant monophasic variants of *Salmonella*  
770 Typhimurium from pig production in Thailand. PeerJ 8: e9700.
- 771 Pathanasophon, P., Worarach, A., Narongsak, W., Yuwapanichsampan, S., Nuangmek, A.,  
772 Sakdasirisathaporn, A., and Chuxnum, T. (2013) Prevalence of *Streptococcus suis* in Tonsils  
773 of Slaughtered Pigs in Lampang and Phayao Provinces, Thailand, 2009-2010. Journal of  
774 Tropical Medicine & Parasitology 36: 8-14.
- 775 Prasertsee, T., Chuammitri, P., Deeudom, M., Chokesajjawatee, N., Santiyanont, P., Tadee, P. et al.  
776 (2019) Core genome sequence analysis to characterize *Salmonella enterica* serovar Rissen  
777 ST469 from a swine production chain. International journal of food microbiology 304: 68-74.
- 778 Prüfer, T.L., Rohde, J., Verspohl, J., Rohde, M., De Greeff, A., Willenborg, J., and Valentin-  
779 Weigand, P. (2019) Molecular typing of *Streptococcus suis* strains isolated from diseased and  
780 healthy pigs between 1996-2016. PloS one 14: e0210801.
- 781 Pumart P, P.T., Thamlikitkul V, Riewpaiboon A, Prakongsai P, Limwattananon S (2012) Health and  
782 economic impacts of antimicrobial resistance in Thailand. J Health Serv Res Policy 6: 352-  
783 360.
- 784 Quinn, P.J., Carter, M.E., Markey, B., and Carter, G.R. (1994) Clinical Veterinary Microbiology:  
785 Wolfe.

- 786 Rayanakorn, A., Ademi, Z., Liew, D., and Lee, L.H. (2020) PIN65 Estimating the lifetime economic  
787 burden of *Streptococcus suis* and its productivity impact in Thailand. Value in Health 23:  
788 S179.
- 789 Rayanakorn, A., Katip, W., Goh, B.H., Oberdorfer, P., and Lee, L.H. (2019) Clinical Manifestations  
790 and Risk Factors of *Streptococcus suis* Mortality Among Northern Thai Population:  
791 Retrospective 13-Year Cohort Study. Infect Drug Resist 12: 3955-3965.
- 792 Redondo-Salvo, S., Fernández-López, R., Ruiz, R., Vielva, L., de Toro, M., Rocha, E.P.C. et al.  
793 (2020) Pathways for horizontal gene transfer in bacteria revealed by a global map of their  
794 plasmids. Nature Communications 11: 3602.
- 795 Robertson, J., and Nash, J.H.E. (2018) MOB-suite: software tools for clustering, reconstruction and  
796 typing of plasmids from draft assemblies. Microbial genomics 4:8.
- 797 Robertson, J., Bessonov, K., Schonfeld, J., and Nash, J.H.E. (2020) Universal whole-sequence-based  
798 plasmid typing and its utility to prediction of host range and epidemiological surveillance.  
799 Microbial Genomics 6:10.
- 800 Seemann, T. (2014) Prokka: rapid prokaryotic genome annotation. Bioinformatics 30: 2068-2069.
- 801 Segura, M. (2020) *Streptococcus suis* Research: Progress and Challenges. Pathogens 9:707.
- 802 Segura, M., Calzas, C., Grenier, D., and Gottschalk, M. (2016) Initial steps of the pathogenesis of the  
803 infection caused by *Streptococcus suis*: fighting against nonspecific defenses. FEBS letters  
804 590: 3772-3799.
- 805 Segura, M., Aragon, V., Brockmeier, S.L., Gebhart, C., Greeff, A.d., Kerdsin, A. et al. (2020) Update  
806 on *Streptococcus suis* Research and Prevention in the Era of Antimicrobial Restriction: 4th  
807 International Workshop on *S. suis*. Pathogens (Basel, Switzerland) 9: 374.
- 808 Seitz, M., Valentin-Weigand, P., and Willenborg, J. (2016) Use of antibiotics and antimicrobial  
809 resistance in veterinary medicine as exemplified by the swine pathogen *Streptococcus suis*. In  
810 How to Overcome the Antibiotic Crisis: Springer, pp. 103-121.
- 811 Sheppard, S.K., Guttman, D.S., and Fitzgerald, J.R. (2018) Population genomics of bacterial host  
812 adaptation. Nature Reviews Genetics 19: 549-565.
- 813 Soares, T.C.S., Paes, A.C., Megid, J., Ribolla, P.E.M., Paduan, K.d.S., and Gottschalk, M. (2014)  
814 Antimicrobial susceptibility of *Streptococcus suis* isolated from clinically healthy swine in  
815 Brazil. Canadian journal of veterinary research 78: 145-149.
- 816 Stevens, M.J.A., Sperry Serrano, N., Cernela, N., Schmitt, S., Schrenzel, J., and Stephan, R. (2019)  
817 Massive diversity in whole-genome sequences of *Streptococcus suis* strains from infected pigs  
818 in Switzerland. Microbiology Resource Announcements 8.5: e01656-18.
- 819 Sweeney, M.T., Lubbers, B.V., Schwarz, S., and Watts, J.L. (2018) Applying definitions for multi-  
820 drug resistance, extensive drug resistance and pandrug resistance to clinically significant  
821 livestock and companion animal bacterial pathogens. Journal of Antimicrobial Chemotherapy  
822 73: 1460-1463.
- 823 Sztanke, K., Pasternak, K., and Sztanke, M. (2004) Oxazolidinones--a new class of broad-spectrum  
824 chemotherapeutics. In Annales Universitatis Mariae Curie-Sklodowska Sectio D: Medicina,  
825 pp. 335-341.
- 826 Tadee, P., Patchanee, P., Pascoe, B., Sheppard, S.K., Meunsene, D., Buawiratler, T., and Tadee, P.  
827 (2021) Occurrence and sequence type of antimicrobial resistant *Salmonella spp.* circulating in  
828 antibiotic-free organic pig farms of northern-Thailand. The Thai Journal of Veterinary  
829 Medicine 51: 311-319.
- 830 Takeuchi, D., Kerdsin, A., Akeda, Y., Chiranairadul, P., Loetthong, P., Tanburawong, N. et al. (2017)  
831 Impact of a food safety campaign on *Streptococcus suis* infection in humans in Thailand. The  
832 American journal of tropical medicine and hygiene 96: 1370-1377.
- 833 Tan, M.F., Tan, J., Zeng, Y.B., Li, H.Q., Yang, Q., and Zhou, R. (2020) Antimicrobial resistance  
834 phenotypes and genotypes of *Streptococcus suis* isolated from clinically healthy pigs from  
835 2017 to 2019 in Jiangxi Province, China. Journal of Applied Microbiology 130.3: 797-806.
- 836 Tedijanto, C., Olesen, S.W., Grad, Y.H., and Lipsitch, M. (2018) Estimating the proportion of  
837 bystander selection for antibiotic resistance among potentially pathogenic bacterial flora.  
838 Proceedings of the National Academy of Sciences 115: e11988-95.
- 839 Thongkamkoon, P., Kiatyingangsulee, T., and Gottschalk, M. (2017) Serotypes of *Streptococcus suis*  
840 isolated from healthy pigs in Phayao Province, Thailand. BMC research notes 10: 53.

- 841 Van Boeckel, T.P., Brower, C., Gilbert, M., Grenfell, B.T., Levin, S.A., Robinson, T.P. et al. (2015)  
842 Global trends in antimicrobial use in food animals. *Proceedings of the National Academy of*  
843 *Sciences* 112: 5649-5654.
- 844 van Samkar, A., Brouwer, M.C., Schultsz, C., van der Ende, A., and van de Beek, D. (2015)  
845 *Streptococcus suis* meningitis: a systematic review and meta-analysis. *PLoS Negl Trop Dis* 9:  
846 e0004191.
- 847 VanderWaal, K., and Deen, J. (2018) Global trends in infectious diseases of swine. *Proceedings of the*  
848 *National Academy of Sciences* 115: 11495.
- 849 Wang, B., Wang, Y., Xie, X., Diao, Z., Xie, K., Zhang, G. et al. (2020) Quantitative Analysis of  
850 Spectinomycin and Lincomycin in Poultry Eggs by Accelerated Solvent Extraction Coupled  
851 with Gas Chromatography Tandem Mass Spectrometry. *Foods* 9: 651.
- 852 Wang, R., van Dorp, L., Shaw, L.P., Bradley, P., Wang, Q., Wang, X. et al. (2018) The global  
853 distribution and spread of the mobilized colistin resistance gene *mcr-1*. *Nature*  
854 *Communications* 9: 1179.
- 855 Wang, Y., Lv, Y., Cai, J., Schwarz, S., Cui, L., Hu, Z. et al. (2015) A novel gene, *optrA*, that confers  
856 transferable resistance to oxazolidinones and phenicols and its presence in *Enterococcus*  
857 *faecalis* and *Enterococcus faecium* of human and animal origin. *Journal of Antimicrobial*  
858 *Chemotherapy* 70: 2182-2190.
- 859 Weinert, L.A., and Welch, J.J. (2017) Why Might bacterial pathogens have small genomes?. *Trends*  
860 *in Ecology & Evolution* 32: 936-947.
- 861 Weinert, L.A., Chaudhuri, R.R., Wang, J., Peters, S.E., Corander, J., Jombart, T. et al. (2019)  
862 Publisher Correction: Genomic signatures of human and animal disease in the zoonotic  
863 pathogen *Streptococcus suis*. *Nature communications* 10: 5326-5326.
- 864 Weinert, L.A., Chaudhuri, R.R., Wang, J., Peters, S.E., Corander, J., Jombart, T. et al. (2015)  
865 Genomic signatures of human and animal disease in the zoonotic pathogen *Streptococcus*  
866 *suis*. *Nature Communications* 6: 6740.
- 867 World Health Organization (2017) WHO guidelines on use of medically important antimicrobials in  
868 food-producing animals: web annex A: evidence base. In: World Health Organization.
- 869 Wisselink, H.J., Joosten, J.J., and Smith, H.E. (2002) Multiplex PCR Assays for Simultaneous  
870 Detection of Six Major Serotypes and Two Virulence-Associated Phenotypes of  
871 *Streptococcus suis* in Tonsillar Specimens from Pigs. *Journal of Clinical Microbiology* 40:  
872 2922-2929.
- 873 Wisselink, H.J., Smith, H.E., Stockhofe-Zurwieden, N., Peperkamp, K., and Vecht, U. (2000)  
874 Distribution of capsular types and production of muramidase-released protein (MRP) and  
875 extracellular factor (EF) of *Streptococcus suis* strains isolated from diseased pigs in seven  
876 European countries. *Veterinary microbiology* 74: 237-248.
- 877 Yan, H., Yu, R., Li, D., Shi, L., Schwarz, S., Yao, H. et al. (2020) A novel multiresistance gene  
878 cluster located on a plasmid-borne transposon in *Listeria monocytogenes*. *Journal of*  
879 *Antimicrobial Chemotherapy* 75: 868-872.
- 880 Yongkiettrakul, S., Maneerat, K., Arechanajan, B., Malila, Y., Srimanote, P., Gottschalk, M., and  
881 Visessanguan, W. (2019) Antimicrobial susceptibility of *Streptococcus suis* isolated from  
882 diseased pigs, asymptomatic pigs, and human patients in Thailand. *BMC veterinary research*  
883 15: 5.
- 884 Young, J.P.W. (2016) Bacteria are smartphones and mobile genes are apps. *Trends in microbiology*  
885 24: 931-932.
- 886 Zhang, A., Yang, M., Hu, P., Wu, J., Chen, B., Hua, Y. et al. (2011) Comparative genomic analysis of  
887 *Streptococcus suis* reveals significant genomic diversity among different serotypes. *BMC*  
888 *Genomics* 12: 523.
- 889 Zhang, C., Zhang, Z., Song, L., Fan, X., Wen, F., Xu, S., and Ning, Y.J.B.r.i. (2015) Antimicrobial  
890 resistance profile and genotypic characteristics of *Streptococcus suis* capsular type 2 isolated  
891 from clinical carrier sows and diseased pigs in China. *BioMed research international* 2015.
- 892 Zhao, S., Tyson, G.H., Chen, Y., Li, C., Mukherjee, S., Young, S. et al. (2016) Whole-genome  
893 sequencing analysis accurately predicts antimicrobial resistance phenotypes in *Campylobacter*  
894 *spp.* *Applied and Environmental Microbiology* 82: 459-466.

895 Zhou, W., Gao, S., Xu, H., Zhang, Z., Chen, F., Shen, H., and Zhang, C. (2019) Distribution of the  
896 *optA* gene in Enterococcus isolates at a tertiary care hospital in China. Journal of global  
897 antimicrobial resistance 17: 180-186.

**A**

bioRxiv preprint doi: <https://doi.org/10.1101/2021.06.17.447897>; this version posted June 17, 2021. The copyright holder for this preprint (which was not certified by peer review) is the author/funder, who has granted bioRxiv a license to display the preprint in perpetuity. It is made available under a [CC-BY-NC-ND 4.0 International license](https://creativecommons.org/licenses/by-nc-nd/4.0/).

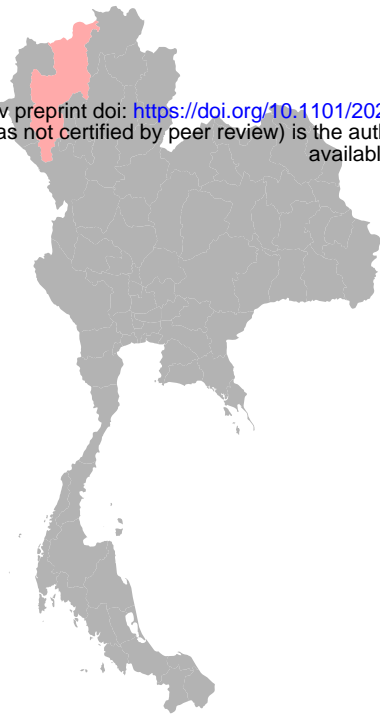

### Chiang Mai province survey

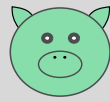

Healthy pigs  
(n=25)

Pig farms: 111 (25 districts)

Pigs sampled: 760

PCR positive *S. suis*: 138

Prevalence: 18.2%

Sequenced: 25

### Comparison collection

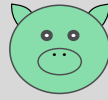

Healthy pigs  
(n=7)

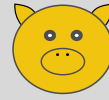

Pig disease  
(n=2)

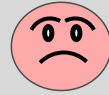

Clinical disease  
(n=2)

**B**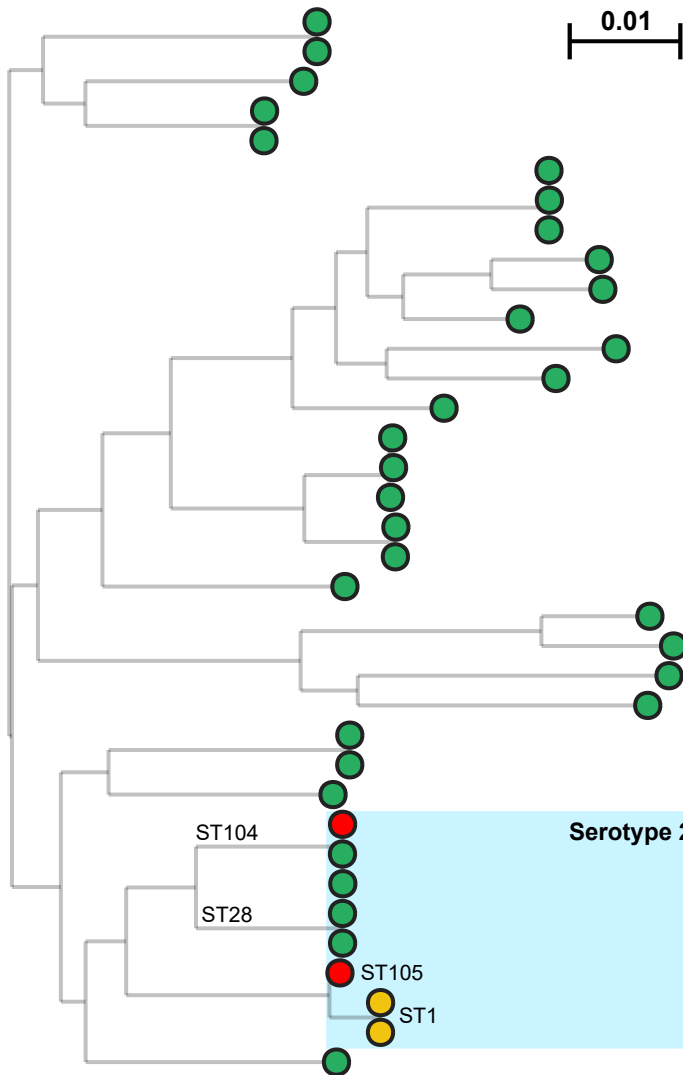

● Healthy pig ● Pig disease ● Human disease

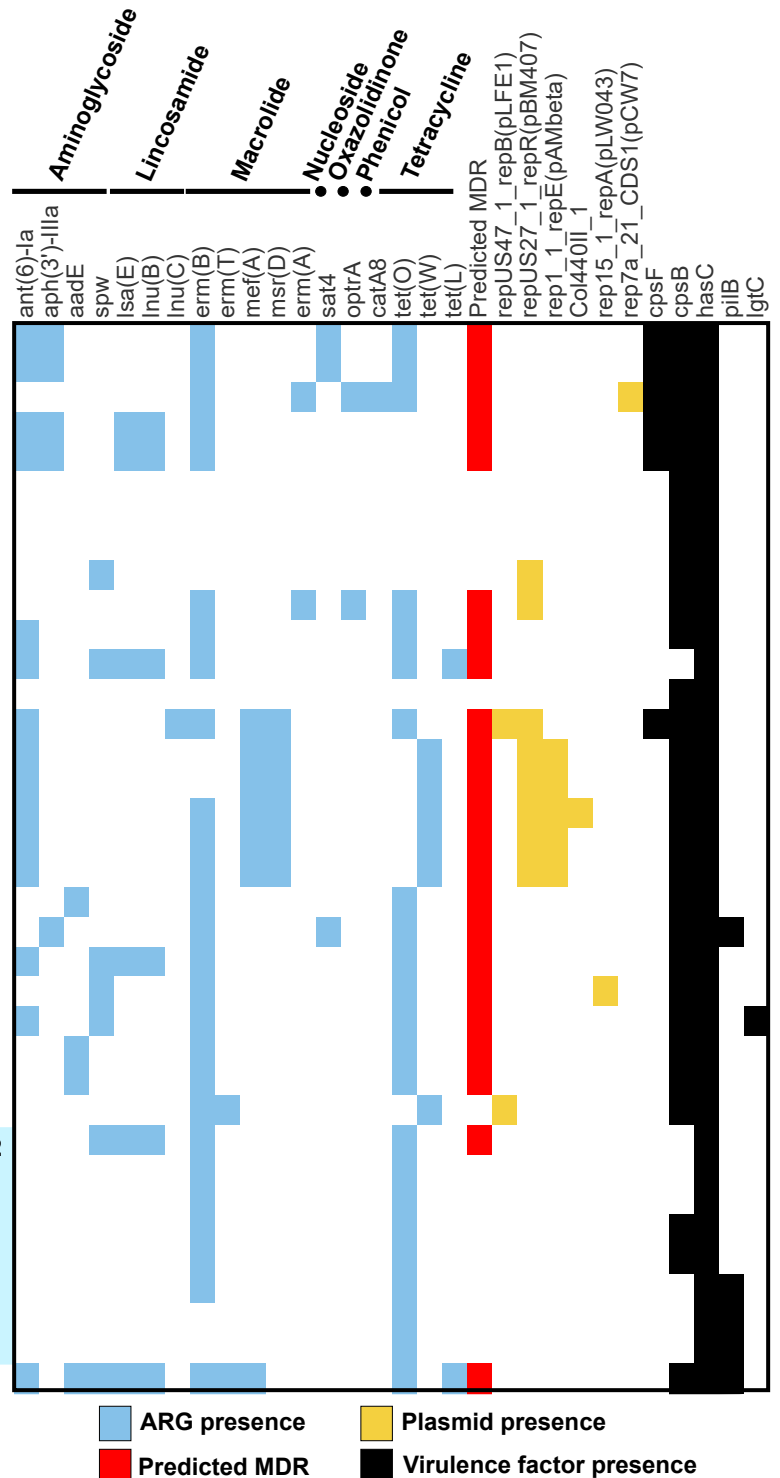

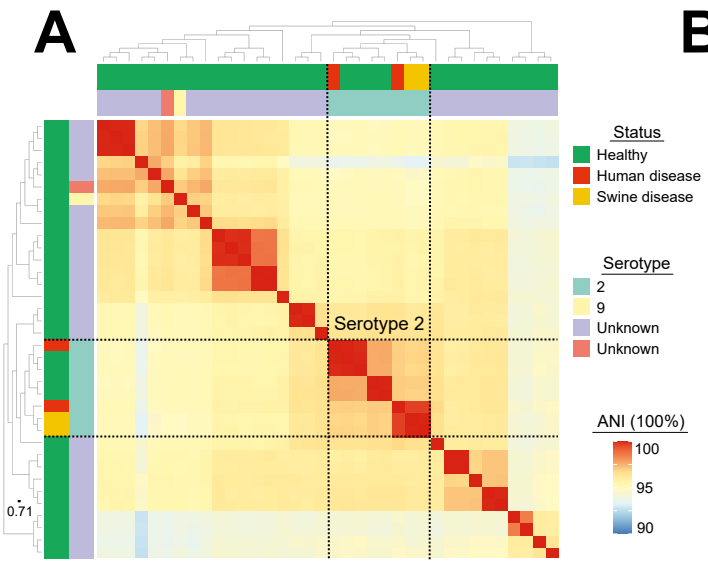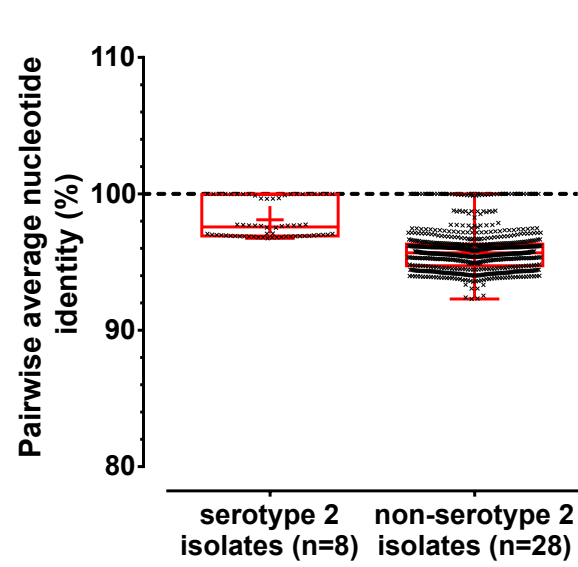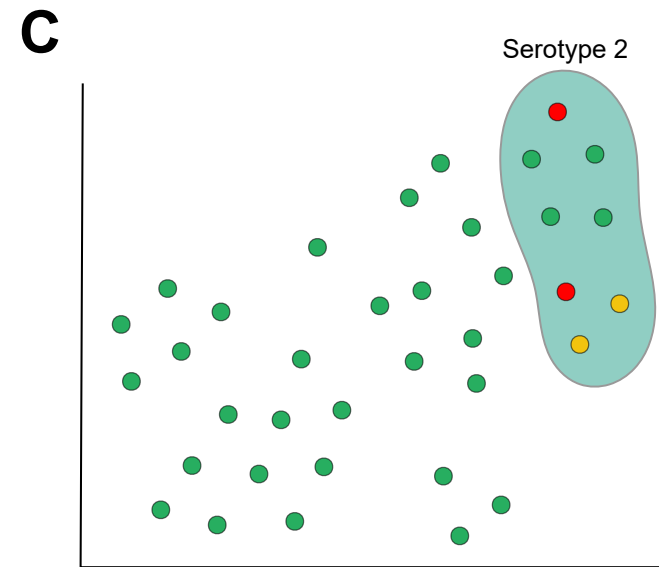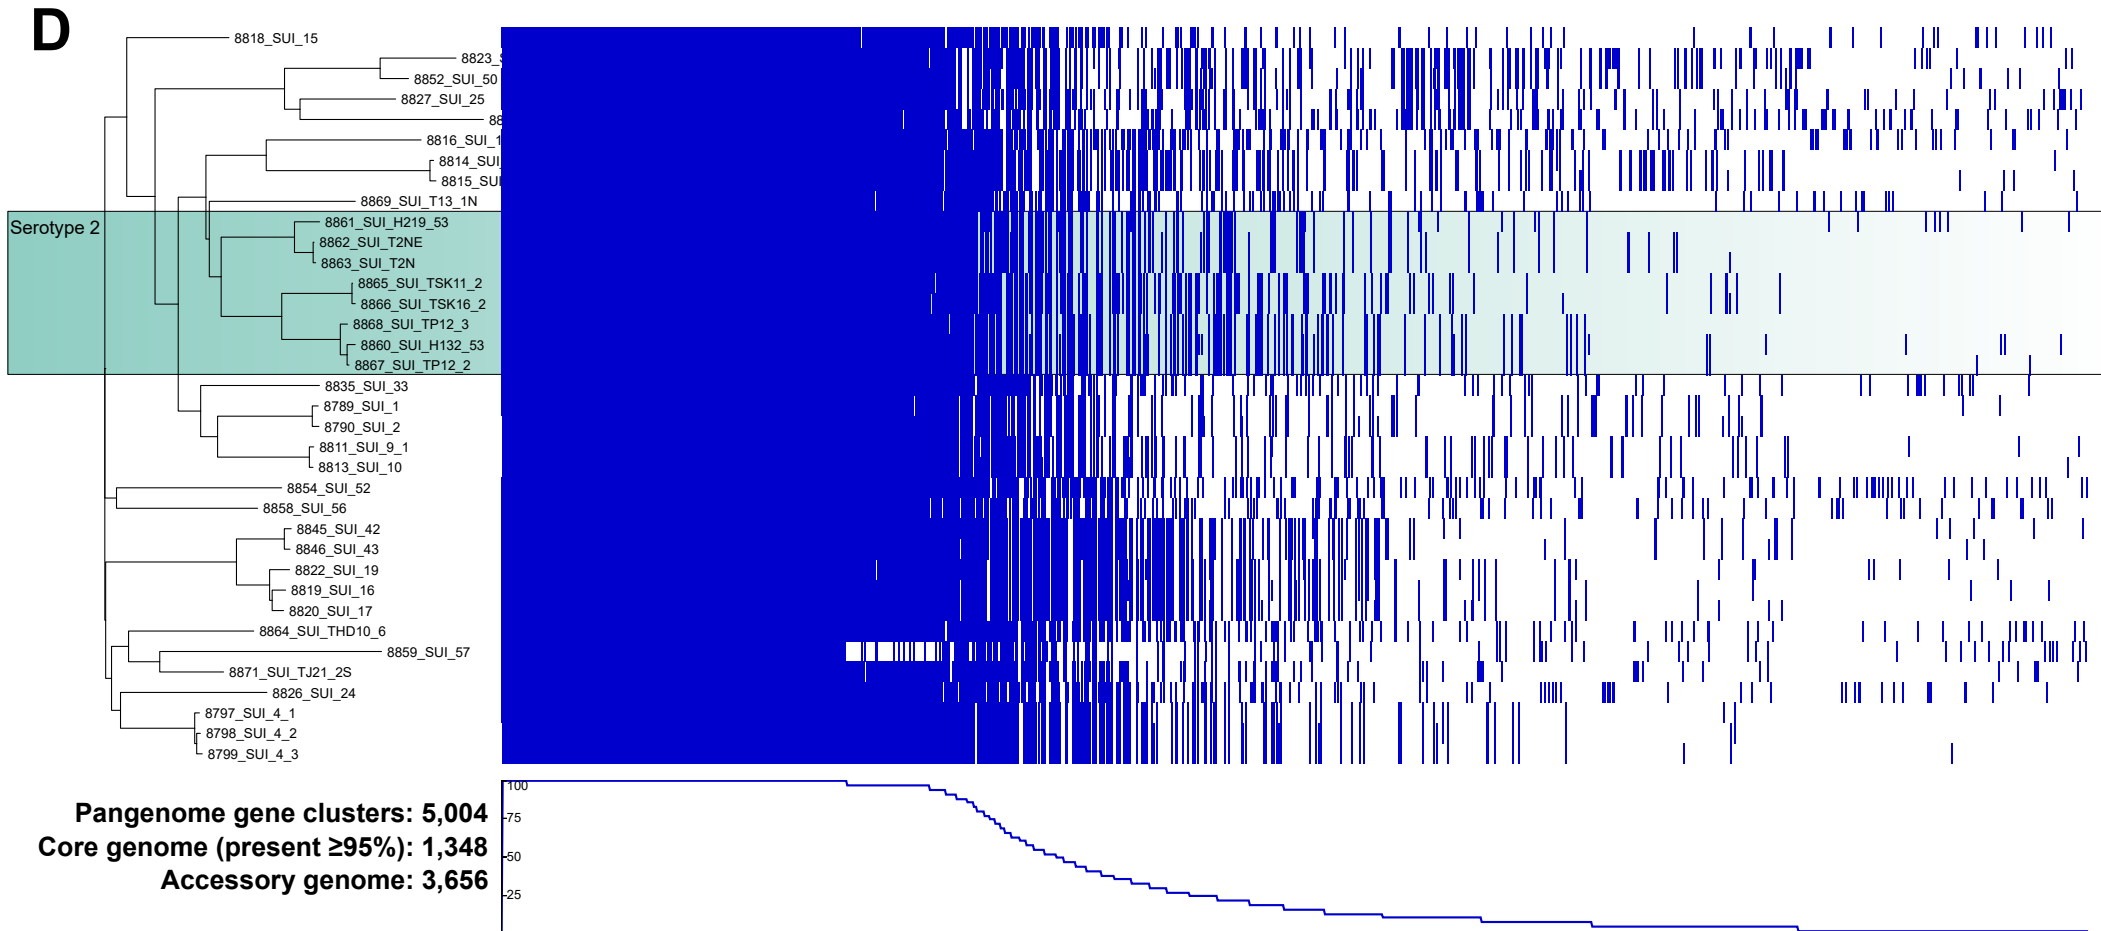

**A**

| Antimicrobial resistance gene patterns                                     | Frequency | <i>ant(6)-Ia</i> | <i>aph(3')-IIIa</i> | <i>aadE</i> | <i>spw</i> | <i>Isa(E)</i> | <i>Inu(B)</i> | <i>Inu(C)</i> | <i>erm(A)</i> | <i>erm(B)</i> | <i>erm(T)</i> | <i>mef(A)</i> | <i>msr(D)</i> | <i>sat4</i> | <i>optrA</i> | <i>catA8</i> | <i>tet(O)</i> | <i>tet(W)</i> | <i>tet(L)</i> | Predicted MDR | Gentamycin | Kanamycin | Lincomycin | Clindamycin | Erythromycin | Tetracycline | Doxycycline | Oxytetracycline | Linezolid | Chloramphenicol | Florfenicol | Ampicillin | Penicillin G | Amoxicillin | AMC | Enrofloxacin | Sulfa-tri | Ceftiofur | Phenotypic MDR |  |  |  |  |  |
|----------------------------------------------------------------------------|-----------|------------------|---------------------|-------------|------------|---------------|---------------|---------------|---------------|---------------|---------------|---------------|---------------|-------------|--------------|--------------|---------------|---------------|---------------|---------------|------------|-----------|------------|-------------|--------------|--------------|-------------|-----------------|-----------|-----------------|-------------|------------|--------------|-------------|-----|--------------|-----------|-----------|----------------|--|--|--|--|--|
| <i>aadE/erm(B)/tet(O)</i>                                                  | 3 (8.3%)  |                  |                     |             |            |               |               |               |               |               |               |               |               |             |              |              |               |               |               |               |            |           |            |             |              |              |             |                 |           |                 |             |            |              |             |     |              |           |           |                |  |  |  |  |  |
| <i>ant(6)-Ia /erm(B)/mef(A)/msr(D)/tet(W)</i>                              | 3 (8.3%)  |                  |                     |             |            |               |               |               |               |               |               |               |               |             |              |              |               |               |               |               |            |           |            |             |              |              |             |                 |           |                 |             |            |              |             |     |              |           |           |                |  |  |  |  |  |
| <i>ant(6)-Ia /mef(A)/msr(D)/tet(W)</i>                                     | 2 (5.6%)  |                  |                     |             |            |               |               |               |               |               |               |               |               |             |              |              |               |               |               |               |            |           |            |             |              |              |             |                 |           |                 |             |            |              |             |     |              |           |           |                |  |  |  |  |  |
| <i>ant(6)-Ia /spw/erm(B)/tet(O)</i>                                        | 1 (2.8%)  |                  |                     |             |            |               |               |               |               |               |               |               |               |             |              |              |               |               |               |               |            |           |            |             |              |              |             |                 |           |                 |             |            |              |             |     |              |           |           |                |  |  |  |  |  |
| <i>ant(6)-Ia/aadE/spw/Isa(E)/Inu(B)/erm(B)/erm(T)/mef(A)/tet(O)/tet(L)</i> | 1 (2.8%)  |                  |                     |             |            |               |               |               |               |               |               |               |               |             |              |              |               |               |               |               |            |           |            |             |              |              |             |                 |           |                 |             |            |              |             |     |              |           |           |                |  |  |  |  |  |
| <i>ant(6)-Ia/aph(3')-III/erm(B)/sat4/tet(O)</i>                            | 2 (5.6%)  |                  |                     |             |            |               |               |               |               |               |               |               |               |             |              |              |               |               |               |               |            |           |            |             |              |              |             |                 |           |                 |             |            |              |             |     |              |           |           |                |  |  |  |  |  |
| <i>aph(3')-III/ant(6)-Ia /Isa(E)/Inu(B)/erm(B)</i>                         | 2 (5.6%)  |                  |                     |             |            |               |               |               |               |               |               |               |               |             |              |              |               |               |               |               |            |           |            |             |              |              |             |                 |           |                 |             |            |              |             |     |              |           |           |                |  |  |  |  |  |
| <i>ant(6)-Ia/erm(B)/tet(O)</i>                                             | 1 (2.8%)  |                  |                     |             |            |               |               |               |               |               |               |               |               |             |              |              |               |               |               |               |            |           |            |             |              |              |             |                 |           |                 |             |            |              |             |     |              |           |           |                |  |  |  |  |  |
| <i>ant(6)-Ia/Inu(C)/erm(B)/mef(A)/msr(D)/tet(O)</i>                        | 1 (2.8%)  |                  |                     |             |            |               |               |               |               |               |               |               |               |             |              |              |               |               |               |               |            |           |            |             |              |              |             |                 |           |                 |             |            |              |             |     |              |           |           |                |  |  |  |  |  |
| <i>ant(6)-Ia/spw/Isa(E)/Inu(B)/erm(B)/tet(O)</i>                           | 1 (2.8%)  |                  |                     |             |            |               |               |               |               |               |               |               |               |             |              |              |               |               |               |               |            |           |            |             |              |              |             |                 |           |                 |             |            |              |             |     |              |           |           |                |  |  |  |  |  |
| <i>ant(6)-Ia/spw/Isa(E)/Inu(B)/erm(B)/tet(O)/tet(L)</i>                    | 1 (2.8%)  |                  |                     |             |            |               |               |               |               |               |               |               |               |             |              |              |               |               |               |               |            |           |            |             |              |              |             |                 |           |                 |             |            |              |             |     |              |           |           |                |  |  |  |  |  |
| <i>aph(3')-III/erm(B)/sat4/tet(O)</i>                                      | 1 (2.8%)  |                  |                     |             |            |               |               |               |               |               |               |               |               |             |              |              |               |               |               |               |            |           |            |             |              |              |             |                 |           |                 |             |            |              |             |     |              |           |           |                |  |  |  |  |  |
| <i>erm(A)/erm(B)/optrA/catA8/tet(O)</i>                                    | 1 (2.8%)  |                  |                     |             |            |               |               |               |               |               |               |               |               |             |              |              |               |               |               |               |            |           |            |             |              |              |             |                 |           |                 |             |            |              |             |     |              |           |           |                |  |  |  |  |  |
| <i>erm(A)/erm(B)/optrA/tet(O)</i>                                          | 1 (2.8%)  |                  |                     |             |            |               |               |               |               |               |               |               |               |             |              |              |               |               |               |               |            |           |            |             |              |              |             |                 |           |                 |             |            |              |             |     |              |           |           |                |  |  |  |  |  |
| <i>erm(B)/erm(T)/tet(W)</i>                                                | 1 (2.8%)  |                  |                     |             |            |               |               |               |               |               |               |               |               |             |              |              |               |               |               |               |            |           |            |             |              |              |             |                 |           |                 |             |            |              |             |     |              |           |           |                |  |  |  |  |  |
| <i>erm(B)/tet(O)</i>                                                       | 5 (13.9%) |                  |                     |             |            |               |               |               |               |               |               |               |               |             |              |              |               |               |               |               |            |           |            |             |              |              |             |                 |           |                 |             |            |              |             |     |              |           |           |                |  |  |  |  |  |
| <i>spw</i>                                                                 | 1 (2.8%)  |                  |                     |             |            |               |               |               |               |               |               |               |               |             |              |              |               |               |               |               |            |           |            |             |              |              |             |                 |           |                 |             |            |              |             |     |              |           |           |                |  |  |  |  |  |
| <i>spw/erm(B)/tet(O)</i>                                                   | 1 (2.8%)  |                  |                     |             |            |               |               |               |               |               |               |               |               |             |              |              |               |               |               |               |            |           |            |             |              |              |             |                 |           |                 |             |            |              |             |     |              |           |           |                |  |  |  |  |  |
| <i>spw/Isa(E)/Inu(B)/erm(B)/tet(O)</i>                                     | 1 (2.8%)  |                  |                     |             |            |               |               |               |               |               |               |               |               |             |              |              |               |               |               |               |            |           |            |             |              |              |             |                 |           |                 |             |            |              |             |     |              |           |           |                |  |  |  |  |  |
| <i>tet(O)</i>                                                              | 2 (5.6%)  |                  |                     |             |            |               |               |               |               |               |               |               |               |             |              |              |               |               |               |               |            |           |            |             |              |              |             |                 |           |                 |             |            |              |             |     |              |           |           |                |  |  |  |  |  |
| No resistance genes found                                                  | 4 (11.1%) |                  |                     |             |            |               |               |               |               |               |               |               |               |             |              |              |               |               |               |               |            |           |            |             |              |              |             |                 |           |                 |             |            |              |             |     |              |           |           |                |  |  |  |  |  |

**B**

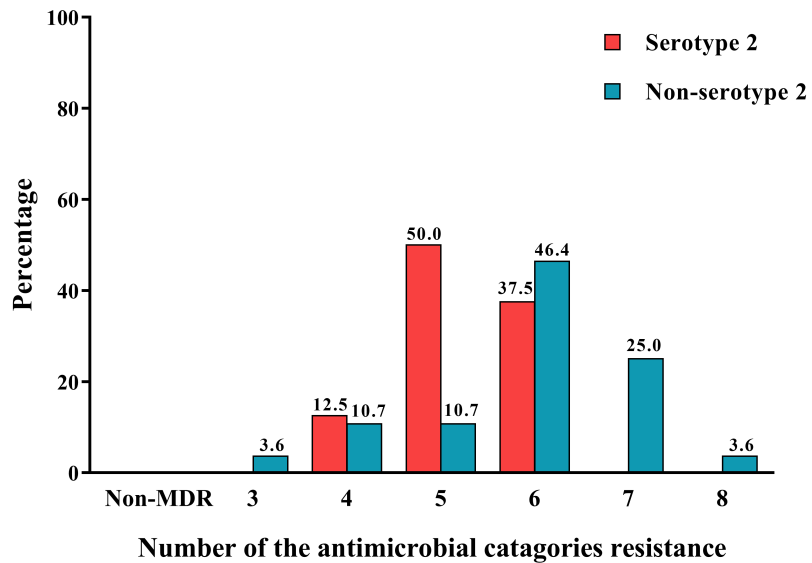

**Table 1.** Antimicrobial susceptibility test results by disk diffusion method of 36 *S. suis*, grouped by serotype. Susceptible (S), intermediate (I) and resistant (R) phenotypes are indicated. Asterisk (\*) indicates statistical significance by Pearson's Chi-square test and Fisher's exact test, p-value < 0.05

| Antibiotics agents | Zone of inhibition (mm) |       |      | <i>S. suis</i> (%) (n=36) |      |      | Serotype 2 (%) (n=8) |      |      | Non-serotype 2 (%) (n=28) |      |       | p-value       |
|--------------------|-------------------------|-------|------|---------------------------|------|------|----------------------|------|------|---------------------------|------|-------|---------------|
|                    | S                       | I     | R    | S                         | I    | R    | S                    | I    | R    | S                         | I    | R     |               |
| GEN <sup>a</sup>   | ≥ 16                    | 13-15 | ≤ 12 | 30.6                      | 38.9 | 30.6 | 0                    | 37.5 | 62.5 | 39.3                      | 39.3 | 24.43 | <b>0.037*</b> |
| KAN <sup>b</sup>   | ≥ 18                    | 14-17 | ≤ 13 | 0                         | 11.1 | 88.9 | 0                    | 25   | 75   | 0                         | 7.1  | 92.9  | 1.000         |
| LIN <sup>c</sup>   | ≥ 19                    | 16-18 | ≤ 15 | 0                         | 0    | 100  | 0                    | 0    | 100  | 0                         | 0    | 100   | 1.000         |
| CLI <sup>d</sup>   | ≥ 19                    | 16-18 | ≤ 15 | 2.8                       | 0    | 97.2 | 12.5                 | 0    | 87.5 | 0                         | 0    | 100   | 0.222         |
| ERY <sup>d</sup>   | ≥ 21                    | 16-20 | ≤ 15 | 16.7                      | 13.9 | 69.4 | 12.5                 | 0    | 87.5 | 17.8                      | 14.3 | 67.9  | 0.719         |
| TET <sup>d</sup>   | ≥ 28                    | 25-27 | ≤ 24 | 2.8                       | 5.6  | 91.7 | 0                    | 0    | 100  | 3.6                       | 7.1  | 89.3  | 0.588         |
| DOX <sup>d</sup>   | ≥ 28                    | 25-27 | ≤ 24 | 0                         | 8.3  | 91.7 | 0                    | 0    | 100  | 0                         | 10.7 | 89.3  | 1.000         |
| OTC <sup>c</sup>   | ≥ 26                    | 16-25 | ≤ 15 | 5.6                       | 11.1 | 83.3 | 0                    | 0    | 100  | 7.1                       | 14.3 | 78.6  | 1.000         |
| LZD <sup>d</sup>   | ≥ 21                    | -     | -    | 100                       | 0    | 0    | 100                  | 0    | 0    | 100                       | 0    | 0     | 1.000         |
| CHL <sup>d</sup>   | ≥ 21                    | 18-20 | ≤ 17 | 44.4                      | 47.2 | 8.3  | 0                    | 100  | 0    | 57.1                      | 32.1 | 10.7  | <b>0.010*</b> |
| FLO <sup>e</sup>   | ≥ 22                    | 19-21 | ≤ 18 | 72.2                      | 22.2 | 5.6  | 75                   | 25   | 0    | 71.4                      | 21.4 | 7.1   | 0.689         |
| AMP <sup>a</sup>   | ≥ 24                    | 23-17 | ≤ 16 | 80.6                      | 13.9 | 5.6  | 100                  | 0    | 0    | 75                        | 17.9 | 7.1   | 0.309         |
| PEN <sup>b</sup>   | ≥ 26                    | 13-25 | ≤ 12 | 30.6                      | 66.7 | 2.8  | 87.5                 | 12.5 | 0    | 14.3                      | 82.1 | 3.6   | <b>0.001*</b> |
| AMX <sup>f</sup>   | ≥ 24                    | 15-23 | ≤ 14 | 83.3                      | 13.9 | 2.8  | 100                  | 0    | 0    | 78.6                      | 17.9 | 3.6   | 0.299         |
| AMC <sup>g</sup>   | ≥ 18                    | 14-17 | ≤ 13 | 97.2                      | 2.8  | 0    | 100                  | 0    | 0    | 92.4                      | 3.6  | 0     | 0.323         |
| CTF <sup>e</sup>   | ≥ 21                    | 18-20 | ≤ 17 | 94.4                      | 5.6  | 0    | 100                  | 0    | 0    | 92.9                      | 7.1  | 0     | 1.000         |
| ENR <sup>b</sup>   | ≥ 23                    | 19-22 | ≤ 18 | 58.3                      | 30.6 | 11.1 | 62.5                 | 37.5 | 0    | 57.1                      | 28.6 | 14.3  | 1.000         |
| SXT <sup>d</sup>   | ≥ 19                    | 16-18 | ≤ 15 | 72.2                      | 5.6  | 22.2 | 87.5                 | 0    | 12.5 | 67.9                      | 7.14 | 25    | 0.160         |

+Antimicrobials used: GEN, gentamycin; KAN, kanamycin; LIN, lincomycin; CLI, clindamycin; ERY, erythromycin; TET, tetracycline; DOX, doxycycline; OTC, oxytetracycline; LZD, linezolid; CHL, chloramphenicol; FLO, florfenicol; AMP, ampicillin; PEN, penicillin G; AMX, amoxicillin; AMC, amoxicillin-clavulanic acid; CTF, ceftiofur; ENR, enrofloxacin; and SXT,

++Interpretative criteria according to: <sup>a</sup>CLSI 2017; <sup>b</sup>NEO-SENSITABS™ 2013; <sup>c</sup>CLSI 2008; <sup>d</sup>CLSI 2020;



**Table 2.** Antimicrobial resistance gene patterns of 36 *S. suis* isolates

| <b>Pattern</b> | <b>Antimicrobial resistance gene patterns</b>                              | <b>Strains</b>                                                                                                   | <b>Frequency</b> |
|----------------|----------------------------------------------------------------------------|------------------------------------------------------------------------------------------------------------------|------------------|
| <b>A</b>       | <i>spw</i>                                                                 | FH57                                                                                                             | 1 (2.8%)         |
| <b>B</b>       | <i>tet(O)</i>                                                              | DP-T2NE †, β, DP-T2N †, β                                                                                        | 2 (5.6%)         |
| <b>C</b>       | <i>erm(B)/tet(O)</i>                                                       | H219-53 <sup>α,β</sup> , TSK11-2 <sup>β</sup> , TSK16-2 <sup>β</sup> , TP12-2 <sup>β</sup> , TP12-3 <sup>β</sup> | 5 (13.9%)        |
| <b>D</b>       | <i>aadE/erm(B)/tet(O)</i>                                                  | FH11, FH12, FH52                                                                                                 | 3 (8.3%)         |
| <b>E</b>       | <i>ant(6)-Ia/erm(B)/tet(O)</i>                                             | THD10-6                                                                                                          | 1 (2.8%)         |
| <b>F</b>       | <i>erm(B)/erm(T)/tet(W)</i>                                                | FH13                                                                                                             | 1 (2.8%)         |
| <b>G</b>       | <i>spw/erm(B)/tet(O)</i>                                                   | FH25                                                                                                             | 1 (2.8%)         |
| <b>H</b>       | <i>aph(3')-III/erm(B)/sat4/tet(O)</i>                                      | FH20                                                                                                             | 1 (2.8%)         |
| <b>I</b>       | <i>ant(6)-Ia /spw/erm(B)/tet(O)</i>                                        | FH51                                                                                                             | 1 (2.8%)         |
| <b>J</b>       | <i>ant(6)-Ia /mef(A)/msr(D)/tet(W)</i>                                     | FH16, FH17                                                                                                       | 2 (5.6%)         |
| <b>K</b>       | <i>erm(A)/erm(B)/optrA/tet(O)</i>                                          | TJ21-2S                                                                                                          | 1 (2.8%)         |
| <b>L</b>       | <i>aph(3')-III/ant(6)-Ia /erm(B)/sat4/tet(O)</i>                           | FH9, FH10                                                                                                        | 2 (5.6%)         |
| <b>M</b>       | <i>aph(3')-III/ant(6)-Ia /lsa(E)/lnu(B)/erm(B)</i>                         | FH1, FH2                                                                                                         | 2 (5.6%)         |
| <b>N</b>       | <i>ant(6)-Ia /erm(B)/mef(A)/msr(D)/tet(W)</i>                              | FH19, FH42, FH43                                                                                                 | 3 (8.3%)         |
| <b>O</b>       | <i>erm(A)/erm(B)/optrA/catA8/tet(O)</i>                                    | FH33                                                                                                             | 1 (2.8%)         |
| <b>P</b>       | <i>spw/lsa(E)/lnu(B)/erm(B)/tet(O)</i>                                     | H132-53 <sup>α,β</sup>                                                                                           | 1 (2.8%)         |
| <b>Q</b>       | <i>ant(6)-Ia/lnu(C)/erm(B)/mef(A)/mrd(D)/tet(O)</i>                        | FH24                                                                                                             | 1 (2.8%)         |
| <b>R</b>       | <i>ant(6)-Ia/lsa(E)/lnu(B)/erm(B)/tet(O)/tet(L)</i>                        | FH15*                                                                                                            | 1 (2.8%)         |
| <b>S</b>       | <i>ant(6)-Ia/spw/lsa(E)/lnu(B)/erm(B)/tet(O)</i>                           | FH50                                                                                                             | 1 (2.8%)         |
| <b>T</b>       | <i>ant(6)-Ia/aadE/spw/lsa(E)/lnu(B)/erm(B)/erm(T)/mef(A)/tet(O)/tet(L)</i> | T13-1N                                                                                                           | 1 (2.8%)         |
| <b>U</b>       | No resistance genes found                                                  | FH4-1, FH4-2, FH4-3, FH56                                                                                        | 4 (11.1%)        |
|                | <b>Total</b>                                                               |                                                                                                                  | <b>36 (100%)</b> |

\* = *S. suis* serotype 9, <sup>α</sup> = *S. suis* from the human case, <sup>β</sup> = *S. suis* serotype 2, † = *S. suis* from diseased pigs

**Table 3.** Concordance of antimicrobial resistance phenotype and genotypes. Presence of resistance genes (G+) and number of phenotypically non-susceptible isolates (P+) indicated. Asterisk indicates p-value < 0.05 by Pearson's chi-square test, and Yate's correction for continuity.

| Antimicrobial agents | AMR genes          | Characterization of phenotypic and genotypic resistance (n=36) |            |            |            | Concordance of phenotypic and genotypic resistance |               |
|----------------------|--------------------|----------------------------------------------------------------|------------|------------|------------|----------------------------------------------------|---------------|
|                      |                    | P+/G+                                                          | P-/G+      | P+/G-      | P-/G-      | OR (95% CI)                                        | p-value       |
| GEN                  | <i>ant(6)-Ia</i>   | 8 (22.2%)                                                      | 7 (19.4%)  | 16 (44.4%) | 5 (13.9%)  | 0.36 (0.08- 1.42)                                  | 0.175         |
|                      | <i>aph(3')-III</i> | -                                                              | 5 (13.89%) | 24 (66.7%) | 7 (17.9%)  | 0.06 (0.005-0.46)                                  | 0.02          |
|                      | <i>aadE</i>        | 3 (8.3%)                                                       | 1 (2.8%)   | 21 (58.3%) | 11 (30.6%) | 1.57 (0.21-22.1)                                   | 0.851         |
|                      | <i>spw</i>         | 3 (8.3%)                                                       | 3 (8.3%)   | 21 (58.3%) | 9 (25%)    | 0.43 (0.09-2.17)                                   | 0.635         |
| KAN                  | <i>ant(6)-Ia</i>   | 15 (41.7%)                                                     | -          | 21 (58.3%) | -          | 0.71 (0.04-14.4)                                   | 0.615         |
|                      | <i>aph(3')-III</i> | 5 (13.9%)                                                      | -          | 31 (86.1%) | -          | 0.16 (0.01-3.64)                                   | 0.714         |
|                      | <i>aadE</i>        | 4 (11.1%)                                                      | -          | 32 (88.9%) | -          | 0.13 (0.01-2.94)                                   | 0.611         |
|                      | <i>spw</i>         | 6 (16.7%)                                                      | -          | 30 (83.3%) | -          | 0.2 (0.01-4.4)                                     | 0.805         |
| LIN, CLI             | <i>lsa(E)</i>      | 6 (16.7%)                                                      | -          | 30 (83.3%) | -          | 0.2 (0.01-4.4)                                     | 0.805         |
|                      | <i>lnu(B)</i>      | 6 (16.7%)                                                      | -          | 30 (83.3%) | -          | 0.2 (0.01-4.4)                                     | 0.805         |
|                      | <i>lnu(C)</i>      | 1 (2.8%)                                                       | -          | 35 (97.2%) | -          | 0.03 (0.002-1.06)                                  | 0.199         |
| ERY                  | <i>erm(A)</i>      | 2 (5.6%)                                                       | -          | 28 (77.8%) | 6 (16.7%)  | 0.43 (0.04-7.16)                                   | 0.745         |
|                      | <i>erm(B)</i>      | 26 (72.2%)                                                     | 1 (2.8%)   | 4 (11.1%)  | 5 (13.9%)  | 32.5 (3.79-390)                                    | <b>0.002*</b> |
|                      | <i>erm(T)</i>      | 2 (5.6%)                                                       | -          | 28 (77.8%) | 6 (16.7%)  | 0.43 (0.04-7.16)                                   | 0.917         |
|                      | <i>mef(A)</i>      | 6 (16.7%)                                                      | 1 (2.8%)   | 24 (66.7%) | 5 (13.9%)  | 1.25 (0.16-16.9)                                   | 0.706         |
|                      | <i>msr(D)</i>      | 5 (13.9%)                                                      | 1 (2.8%)   | 25 (69.4%) | 5 (13.9%)  | 1 (0.12-13.9)                                      | 0.548         |
| TET                  | <i>tet(O)</i>      | 23 (63.9%)                                                     | -          | 12 (33.3%) | 1 (2.3%)   | 1.92 (0.09-37.8)                                   | 0.758         |
|                      | <i>tet(W)</i>      | 6 (16.7%)                                                      | -          | 29 (80.6%) | 1 (2.8%)   | 0.207 (0.01-4.55)                                  | 0.821         |
|                      | <i>tet(L)</i>      | 2 (5.6%)                                                       | -          | 33 (91.7%) | 1 (2.8%)   | 0.06 (0.003-1.7)                                   | 0.368         |
| DOX                  | <i>tet(O)</i>      | 23 (63.9%)                                                     | -          | 13 (36.1%) | -          | 1.77 (0.09-34.9)                                   | 0.721         |
|                      | <i>tet(W)</i>      | 6 (16.7%)                                                      | -          | 30 (83.3%) | -          | 0.2 (0.01-4.40)                                    | 0.805         |
|                      | <i>tet(L)</i>      | 2 (5.6%)                                                       | -          | 3 (94.4%)  | -          | 0.06 (0.03-1.65)                                   | 0.357         |
| OTC                  | <i>tet(O)</i>      | 23 (63.9%)                                                     | -          | 11 (30.6%) | 2 (5.6%)   | 4.18 (0.43-62.7)                                   | 0.573         |
|                      | <i>tet(W)</i>      | 6 (16.7%)                                                      | -          | 28 (77.8%) | 2 (5.6%)   | 0.43 (0.04-7.16)                                   | 0.917         |
|                      | <i>tet(L)</i>      | 2 (5.6%)                                                       | -          | 32 (88.9%) | 2 (5.6%)   | 0.12 (0.01-2.65)                                   | 0.571         |
| LZD                  | <i>optrA</i>       | -                                                              | 2 (5.6%)   | -          | 34 (94.4%) | 17 (0.61-327)                                      | 0.357         |
| CHL                  | <i>catA8</i>       | 1 (2.8%)                                                       | -          | 19 (52.8%) | 16 (44.4%) | 0.84 (0.04-16.9)                                   | 0.541         |
| FLO                  | <i>catA8</i>       | 1 (2.8%)                                                       | -          | 9 (25%)    | 26 (72.2%) | 2.89 (0.14-56.6)                                   | 0.947         |
